1 **Effective prediction of biosynthetic pathway genes involved in bioactive polyphyllins**  
2 **in Paris polyphylla**

3 Xin Hua<sup>1,&</sup>, Wei Song<sup>2</sup>, &, Kangzong Wang<sup>1,&</sup>, Xue Yin<sup>1</sup>, Changqi Hao<sup>1</sup>, Baozhong  
4 Duan<sup>6</sup>, Zhichao Xu<sup>3\*</sup>, Tongbing Su<sup>4,5\*</sup>, Zheyong Xue<sup>1\*</sup>

5 <sup>1</sup> Key Laboratory of Saline-alkali Vegetation Ecology Restoration (Northeast Forestry  
6 University), Ministry of Education, Harbin, China

7 <sup>2</sup> College of Pharmacy, Zhejiang Chinese Medical University, Hangzhou, China

8 <sup>3</sup> Institute of Medicinal Plant Development, Chinese Academy of Medical Sciences &  
9 Peking Union Medical College, Beijing, China

10 <sup>4</sup> Beijing Vegetable Research Center (BVRC), Beijing Academy of Agriculture and  
11 Forestry Science (BAAFS), Beijing, China

12 <sup>5</sup> National Engineering Research Center for Vegetables, Beijing 100097, China

13 <sup>6</sup> College of Pharmaceutical Science, Dali University, Dali, China

14 & X.H., W.S. and K.W. contributed equally.

15 \* corresponding author: Zheyong Xue ([zyxue@nefu.edu.cn](mailto:zyxue@nefu.edu.cn)), Tongbing Su  
16 ([sutongbing@nercv.org](mailto:sutongbing@nercv.org)) or Zhichao Xu ([zcxu@implad.ac.cn](mailto:zcxu@implad.ac.cn)).

17

18

19

20

21

22

23

24 **ABSTRACT**

25 The genes in polyphyllins pathway mixed with other steroid biosynthetic genes form  
26 an extremely complex biosynthetic network in *Paris polyphylla* with a giant genome. The  
27 lack of genomic data and tissue specificity causes the study of the biosynthetic pathway  
28 notably difficult. Here, we report an effective method for the prediction of key genes of  
29 polyphyllin biosynthesis. Full-length transcriptome from eight different organs via hybrid  
30 sequencing of next generation sequencing and third generation sequencing platforms  
31 annotated two 2,3-oxidosqualene cyclases (OSCs), 216 cytochrome P450s (CYPs), and  
32 199 UDP glycosyltransferases (UGTs). Combining metabolic differences, gene-weighted  
33 co-expression network analysis, and phylogenetic trees, the candidate ranges of *OSC*,  
34 *CYP*, and *UGT* genes were further narrowed down to 2, 15, and 24, respectively. Beside  
35 the three previously characterized CYPs, we identified the OSC involved in the synthesis  
36 of cycloartenol and the UGT (PpUGT73CR1) at the C-3 position of diosgenin and  
37 pennogenin in *P. polyphylla*. This study provides a idea for the investigation of gene  
38 cluster deficiency biosynthesis pathways in medicinal plants.

39 **Keywords:** 2,3-oxidosqualene cyclase; Metabolic biosynthetic pathways; *Paris*  
40 *polyphylla*; Steroid saponins; UGT glucosyltransferase.

41

42

43

44

45

46

## 47 INTRODUCTION

48 *P. polyphylla* var. *yunnanensis* is a member of Liliaceae family and one of the most  
49 famous medicinal plants in China. The rhizome of this plant is an important component  
50 of the traditional Chinese medicines “Yunnan Baiyao” and “Gongxue Ning,”<sup>1</sup> which have  
51 pharmacological activities, such as hemostasis, analgesic, sedation, anti-inflammatory,  
52 and anti-tumor effects<sup>2-4</sup>. The main active components of this plant are steroidal saponins,  
53 also known as polyphyllins, accounting for about 80% of the total number of active  
54 compounds<sup>5</sup>. Polyphyllins have aroused great interest for their rich pharmacological  
55 activities, including anti-inflammatory, vascular protection, hypoglycemic,  
56 immunomodulatory, antiparasitic, hypocholesterolemic, antifungal, anti-parasitic, and  
57 anti-tumor effects<sup>4,6,7</sup>. However, the species is at risk of extinction due to its slow growth  
58 and excessive exploitation<sup>8</sup>. Given their complex molecular structures, polyphyllins are  
59 unlikely to be chemically synthesized for commercial usages. Therefore, metabolic  
60 engineering may be an effective method to provide a stable source of polyphyllins. The  
61 metabolic engineering strategy largely relies on the biosynthetic pathway of polyphyllins,  
62 which still has not been fully elucidated.

63 Polyphyllins are a group of products with different sugar chains connected at the C-3  
64 or C-26 position of diosgenin or pennogenin. Diosgenin is also an important precursor to  
65 the synthesis of over 200 steroidal drugs (e.g., contraceptives, testosterone, progesterone,  
66 and glucocorticoids)<sup>8</sup>. However, the sources of diosgenin mainly depend on the  
67 extraction from several specific plants, such as yam (*Dioscorea* genus) and fenugreek  
68 (*Trigonella foenum-graecum*). The biosynthetic pathway of polyphyllins begins with the

69 condensation of two molecules of isopentenyl diphosphate and one molecule of  
70 dimethylallyl diphosphate, which is then catalyzed by farnesyl diphosphate synthase  
71 (FPS) to form farnesyl diphosphate (FPP, C15)<sup>9</sup>. Two FPP molecules are catalyzed by  
72 squalene synthase (SQS) to produce a linear C30 molecule, squalene, which is further  
73 cycled by squalene epoxidase to 2,3-oxidosqualene<sup>9</sup>. Then, 2,3-oxidosqualene is cyclized  
74 by a cycloartenol synthase (CAS) to form cycloartenol, which is then modified through a  
75 series of oxidation and reduction to form cholesterol<sup>10,11</sup>. Enzymes in the CYP90G family  
76 can catalyze the hydroxylation of cholesterol C-16 and C-22 with the closure of E ring.  
77 Then, *16S,22S*-dihydroxycholesterol is further hydroxylated at C-26 and forms an F ring  
78 to produce diosgenin under the action of cytochrome P450s (CYPs), such as  
79 PpCYP94D108<sup>12</sup>. However, how steroidal skeleton  $\alpha$ -hydroxylates at C-17 form  
80 pennogenin is still unknown. Subsequently, diosgenin and pennogenin are glycosylated  
81 by UDP glycosyltransferases (UGTs) to form various polyphyllins (Figure 1). To date, the  
82 UGTs related to polyphyllin biosynthesis have still not been selected and functionally  
83 identified.

84 Although genomic and transcriptional information of numerous medicine plants have  
85 been generated and made available to public, the progress of candidate gene mining and  
86 whole pathway dissection of specialized plant metabolites remains slow due to the  
87 following factors<sup>6,12-15</sup>. The biosynthesis of several specified metabolites, such as the  
88 ginsenosides in Araliaceae family, lacks tissue specificity. A variety of ginsenosides are  
89 widely found in multiple tissue parts of the plant, and the complex distribution pattern of  
90 ginsenoside components hinders the prediction of the exact genes involved in  
91 biosynthetic pathway application by simple differentially expression analysis<sup>16</sup>. The

92 divergent evolution of CYP and UGT families generated numerous individual members  
93 that are phylogenetically close and can decorate diverse type of natural products. For this  
94 reason, predicting the related pathway gene solely based on phylogenetic analysis is  
95 impossible<sup>17</sup>. A previous study reported the extremely huge genome size of Parideae  
96 species (about 50 pg) (Pellicer et al., 2014). In addition, the biosynthetic genes of specific  
97 plant metabolites are scattered in different regions of the genome, further increasing the  
98 difficulty in identifying candidates precisely by physical distance of metabolic pathway-  
99 related genes<sup>18,19</sup>, despite the generation and good assembly of whole-genome  
100 sequences<sup>20,21</sup>. Therefore, an efficient strategy needs to be developed and improved  
101 urgently to accurately predict the key genes in the complex none-clustered biosynthetic  
102 pathway of specialized plant metabolites.

103 In this study, full-length transcriptome analysis using hybrid sequencing strategy based  
104 on single-molecule sequencing and paired-end mRNA sequencing was performed on  
105 eight different tissues from *P. polyphylla* var. *yunnanensis*. The weighted gene co-  
106 expression network analysis (WGCNA) combining the distributions of specific  
107 metabolites, different gene expressions, and phylogenetic analysis was further used to  
108 predict the key genes involved in the biosynthesis of polyphyllins. Then, candidate genes  
109 containing several assumed 2,3-oxidosqualene cyclase (OSC) genes and UGTs were  
110 functionally verified. This study may provide a strong basis for characterizing the steps of  
111 biosynthesis of polyphyllins of *P. polyphylla* var. *yunnanensis*, thus promoting the  
112 production of such important chemicals via synthetic biology.

113

114 **METHODS**

## 115 **Plant material and RNA preparation**

116 Samples of four-year dwarf *P. polyphylla* var. *yunnanensis* were collected from Dali,  
117 Yunnan, China. The rhizomes, fibrous roots, stems, leaves, ripe fruits, stigma, petals, and  
118 pistil were harvested in 5-year-old healthy plants (Figure S1). The rhizomes, fibrous roots,  
119 stems, leaves, and ripe fruits were harvested in October 2018, whereas the stigma, petals,  
120 and pistil were harvested in April 2019. All tissues were frozen in liquid nitrogen  
121 immediately and stored at  $-80^{\circ}\text{C}$  after collection. Every sample had three biological  
122 replicates that were sequenced independently.

## 123 **RNA isolation, transcriptome sequencing, and gene function annotation**

124 The sequencing samples of rhizomes, fibrous roots, stems, leaves, ripe fruits, stigma,  
125 petals, and pistil were from multiple plants, and the full-length transcriptome sequencing  
126 samples were from a mixture of different tissues from multiple plants. Total RNA was  
127 isolated using an RNA Plus kit (Takara, Qingdao, China), in accordance with the  
128 manufacturer's protocol. Three biological replicates of rhizome, fibrous root, stem, leaf,  
129 and ripe fruit were determined, and two biological replicates of stigma, anther, and petal  
130 were tested due to difficulty in sample collection and insufficient RNA quality. RNA  
131 quality was examined using Agilent 2100 (Agilent Technologies, Santa Clara, USA). The  
132 cDNA library was constructed and sequenced by Biomarker Technologies Corporation  
133 (Beijing, China). A single tissue was sequenced using an Illumina Hiseq 2000 platform,  
134 and full-length transcriptome sequencing for the mixture of different tissues was  
135 performed using PacBio Sequel platform. The PacBio long reads were filtered, and  
136 redundant sequences were removed using CD-HIT-EST program. In full-length  
137 transcriptome data, sequences with polymerase read less than 50 bp and sequence

138 accuracy less than 0.9 were filtered out. Then, the clean reads from Illumina sequencing  
139 were mapped into the non-redundant long-reads to calculate the Fragments Per Kilobase  
140 per Million (FPKM) values using DESeq2. Specifically,  $FPKM = \text{cDNA fragments} /$   
141  $\text{mapped fragments (millions)} \times \text{transcript length (kb)}$ , where cDNA fragments represent  
142 the number of fragments aligned to a transcript, mapped fragments (millions) is the total  
143 number of fragments aligned to the transcript; transcript length (kb) denotes the transcript  
144 length. The filtered full-length transcripts were functionally annotated using non-  
145 redundant (nr), SWISSPROT, Gene Ontology, Clusters of Orthologous Genes,  
146 EuKaryotic Orthologous Groups (KOG), PFAM, and Kyoto Encyclopedia of Genes and  
147 Genomes databases, respectively.

#### 148 **Phylogenetic Analysis**

149 Transcripts belonging to OSCs, CYPs, and UGTs were identified using BLAST  
150 software. The transcripts with a length under 1000 bp were removed. Table S1 lists the  
151 OSC sequences from different plants used to construct the phylogenetic tree. The  
152 phylogenetic trees of OSCs, P450s, and UGTs were constructed using the maximum  
153 likelihood method and Jones–Taylor–Thornton model using MEGA 7.0<sup>22</sup>. A bootstrap  
154 resampling analysis with 1000 replicates was performed to evaluate the topology of  
155 phylogeny.

#### 156 **Metabolite content determination**

157 The tissues frozen at -80 °C were lyophilized in a freeze dryer. Then, 20 mg dry  
158 materials from different tissues were weighted and placed in a 2 mL centrifuge tube. A  
159 total of 1 mL 80% methanol containing 20 µg internal standard was added to the sample  
160 (digitoxin, ≥95%, Sigma). The samples were further extracted at 1400 rpm for 2 h and

161 centrifuged at 10,000 g for 5 min. The supernatant was transferred to a new centrifuge  
162 tube and added with 300  $\mu$ L n-hexane for extraction. After extraction, the n-hexane layer  
163 was sucked and removed, and the process above was repeated. SpinVac was applied for  
164 solvent removal in the samples. The samples were redissolved with 500 ml distilled water.  
165 Then, extraction was performed twice with 500 mL n-butanol. Nitrogen was used to dry  
166 the organic phase of the sample and redissolved sample with the mobile phase during  
167 measurement.

168 The analysis was performed on a Waters ACQUITY ultra-performance liquid  
169 chromatography (LC) system coupled with an AB Sciex 5500 Qtrap mass spectrometer  
170 (AB Sciex, Milford, MA, USA). Chromatographic separation was achieved on a  
171 ACQUITY BEH C18 column ( $100 \times 2.1 \text{ mm}^2$ ,  $1.7 \mu\text{m}$ ) at  $40 \text{ }^\circ\text{C}$ . The 0.1% formic acid  
172 water was used as mobile phase A, and 0.1% formic acid in acetonitrile was used as  
173 mobile phase B. The gradient was 0–1 min, 5%–52% B; 1–6 min, 52%–56% B; 6–7 min,  
174 56%–95% B; 7–7.5 min, 95%–95% B; 7.5–9 min, 95%–5% B; 9–10 min, 5%–5% B. The  
175 flow rate was  $0.25 \text{ mL min}^{-1}$ , and the injection volume was  $5 \mu\text{L}$ . The electrospray  
176 ionization source interface operated in negative ionization mode was used in this study.  
177 The ion spray voltage was set at  $-4500 \text{ V}$ . Table S2 shows the optimized multiple reaction  
178 monitoring parameters for the analytes and internal standard. Cholesterol detection was  
179 completed on a Thermo ISQ-LT gas chromatography–mass spectrometry (GC-MS)  
180 system using Thermo TG-5HT column ( $30 \text{ m} \times 0.25 \text{ mm} \times 0.10 \mu\text{m}$ ). The mass detector  
181 was set to SCAN mode, the scanning range was 60–800 m/z, and solvent delay was 10  
182 min. The GC conditions were as follows. The sample ( $1 \mu\text{L}$ ) was injected in split mode  
183 (10:1) at  $250 \text{ }^\circ\text{C}$  under a He flow rate of  $1.2 \text{ mL min}^{-1}$ , and the temperature cycle



184 involved the initial injection temperature of 170 °C for 2 min, 170 °C to 290 °C for 6 min per  
185 minute, holding for 4 min after the temperature reached 290 °C, and raising the  
186 temperature from 290 °C to 340 °C at 25 °C per minute.

### 187 **Construction of gene co-expression networks**

188 Gene co-expression networks were constructed using the WGCNA approach with R  
189 packages (version 3.2.2)<sup>23</sup>. Here, we used the normalized quantile function in the R  
190 software package to normalize the gene expression data. We selected the expression  
191 matrix of 31,937 genes with the sum FPKM value in all tissues greater than 1.0 from all  
192 genes as the input file for WGCNA to identify gene modules with strong co-expression.  
193 Before the construction of the network module, outlier samples should be removed to  
194 ensure the accuracy of the results because the analysis results of network module are  
195 easily affected by outlier samples. By calculating the correlation coefficient of each  
196 sample's expression level and clustering, the samples with low correlation or those that  
197 cannot be clustered on the tree graph are removed. Next, WGCNA network construction  
198 and module detection were conducted using an unsigned type of topological overlap  
199 matrix (TOM). Based on the TOM, we used the average-linkage hierarchical clustering  
200 method to cluster genes, following the standard of hybrid dynamic shearing tree and set  
201 the minimum number of genes for each gene network module to 30. The power  $\beta$  was  
202 selected based on the scale-free topology criterion. The modules were detected as  
203 branches of the dendrogram using the dynamic tree-cut, and a cut-off height of 0.25 was  
204 used to merge the branches to final modules.

205 Finally, the gene visual network was described by using heatmap. The heatmap depicts  
206 the TOM among all genes in the analysis. Light color represents a low overlap, and

207 progressively darker red color represents higher overlap. Blocks of darker colors along  
208 the diagonal are the modules, and a very strong association existed between the genes  
209 that are contained within these red modules. These red modules were the focus of our  
210 genetic prediction.

### 211 **Functional verification of OSC genes**

212 The function of OSC gene was verified by yeast strain and *Nicotiana benthamiana*.  
213 Table S3 shows all the selected strains and plasmids used in the yeast experiment.  
214 *PpOSC1* and *PpOSC2* were cloned from *P. polyphylla* var. *yunnanensis* and transferred in  
215 to pδHis plasmid. The plasmid was transformed into yeast strain BY-SQ1 using the  
216 standard lithium acetate approach. The yeast strains SQ-PpOSC1 and SQ-PpOSC2 were  
217 precultured in 5 ml synthetic defined medium with glucose as carbon source and uracil  
218 and histidine omitted (SD-URA-HIS) at 30 °C and 220 rpm for 24 h. Precultures were  
219 inoculated at an initial optical density (OD)<sub>600</sub> of 0.05 in 50 ml SD-URA-HIS in 250 ml  
220 flasks and grown under the same condition for 72 h. The cells were harvested,  
221 resuspended in 2 ml 10% KOH (w/v) and 90% ethanol (v/v), heated for 2 h at 75 °C, and  
222 cooled and extracted once with 0.5 ml ethyl acetate. After centrifugation, the ethyl acetate  
223 phase was collected and dried by centrifugal vacuum evaporator. Derivatization of the  
224 dried products was conducted with 1-(trimethylsilyl)imidazole-pyridine mixture at 70 °C  
225 for 30 min to prepare the sample for analysis.

226 In the transient expression system of *Nicotiana benthamiana*, the coding regions of  
227 candidate OSC genes were cloned from *P. polyphylla* var. *yunnanensis* into the pEAQ-  
228 HT-DEST1 vector. After sequence verification, pEAQ-HT-DEST1 vectors carrying OSC  
229 genes were separately transferred into *Agrobacterium tumefaciens* strain GV3101 and

230 cultured overnight at 28 °C and 220 rpm. Then, 1 mL culture was used to inoculate 10  
231 mL Luria–Bertani (LB) medium containing 50 µg/mL kanamycin, 25 µg/mL rifampicin,  
232 and 25 µg/mL gentamicin for overnight growth. The following day, the cultures were  
233 centrifuged (5000 g, 5 min), and cells were resuspended in infiltration buffer (10 mM  
234 MES (C<sub>6</sub>H<sub>13</sub>NO<sub>4</sub>S), pH 5.6, 10 mM MgCl<sub>2</sub>, and 100 µM acetosyringone) to a final OD<sub>600</sub>  
235 of 0.4. The leaves of 6-week-old *N. benthamiana* were infiltrated with *A. tumefaciens*  
236 solution as follows. A 5 mL needle-free syringe was used to gently push the bacterial  
237 mixture into the abaxial surface until the entire leaf was filled with agrobacterium. The  
238 infiltrated leaves were cultured at 22 °C, exposed to light for 10 h a day, and harvested at  
239 6th day after infiltration. For metabolite extraction, leaf discs in diameter 1cm were  
240 prepared from *Agrobacterium*-infiltrated *N. benthamiana* and dried with a vacuum  
241 freeze-dryer. Then, the leaves were ground into powder, and 10 mg powder was weighed  
242 and placed a 2 mL tube for use. Then, 2 mL lysate was added to each sample and heated  
243 in the water bath (75 °C for 1 h). After the samples were completely dried, 300 µL ethyl  
244 acetate and 500 µL water were added and mixed with vortex shock and centrifuged for 10  
245 min to facilitate separation. Next, 100 µL was removed from the upper layer (ethyl  
246 acetate layer) and transferred to a special glass tube. The liquid was blow dried with  
247 nitrogen and added with 50 µL 1-(trimethylsilyl) imidazole-pyridine mixture. After  
248 vortex-mixing–heating at 70 °C for 30 min, the mixture was analyzed with GC-MS same  
249 as cholesterol analysis above.

250 **Cloning and prokaryotic expression of *UGT* genes from *P. polyphylla* var.**  
251 ***yunnanensis***

252 The total RNA from the *P. polyphylla* var. *yunnanensis* was extracted and reverse

253 transcribed to obtain cDNA. The candidate polymerase chain reaction (PCR) primers for  
254 UGTs were designed based on the transcriptome sequence. The PCR procedure was as  
255 follows: 95 °C for 3 min; 95 °C for 30 s, 60 °C for 30 s, and 72 °C for 90 s in 33 cycles;  
256 72 °C for 5 min. The primers of UGT genes are shown in Table S4. The prokaryotic  
257 expression vector pGEX-6p-1 was linearized with restriction endonucleases EcoR I and  
258 Sal I (Thermo), recombined with the PCR product through the ClonExpress II One Step  
259 Cloning Kit (Vazyme), and transformed into *E. coli* DH5 $\alpha$ .

260 The plasmid with correct sequencing was transformed into Rosetta-gami B (DE3)  
261 pLysS and inoculated into LB liquid medium containing ampicillin (100 mg/L) and then  
262 cultured at 37 °C at 180 rpm until the OD<sub>600</sub> of = 0.6. A total of 0.2 mM isopropyl  $\beta$ -d-1-  
263 thiogalactopyranoside was added to the culture medium, induced at 16 °C for 16 h, and  
264 centrifuged at 4 °C at 5,000 rpm to collect the bacteria. The bacterial cells were  
265 suspended in 10 mM phosphate buffer (pH 7.4), and the cells were disrupted by  
266 ultrasound in an ice bath. Then, the cells were centrifuged at 12,000 g at 4 °C for 20 min.  
267 The bacterial supernatant was purified using glutathione beads (Smart-Life Sciences,  
268 Changzhou, China) and concentrated using Millipore ultrafiltration tubes (Meck,  
269 Darmstadt, Germany). Pierce BCA Protein Assay Kit (Thermo, Waltham, USA) was used  
270 to quantify the target protein.

271 Enzyme activity analysis

272 The enzymatic reaction system consisted of 50 mM Tris (pH 8.0), 1 mM MgCl<sub>2</sub>, 5 mM  
273 glucose donor (UDP-glucose), 1 mM glucose receptor (diosgenin/pennogenin), and  
274 purified enzyme of PpUGT73CR1 in a final volume of 100  $\mu$ L. After overnight  
275 incubation at 37 °C, an equal volume of ice methanol was added to stop the reaction. The

276 product was concentrated and dried, dissolved in 100  $\mu$ L chromatographic methanol, and  
277 centrifuged at 12,000 rpm for 10 min, and the supernatant was obtained for testing. The  
278 reaction products were identified by high-performance LC (HPLC) and LC time-of-flight  
279 mass spectrometry (LC-TOF-MS), and the Thermo Hypersil GOLD C18 column (250  
280 mm  $\times$  4.6 mm, 5  $\mu$ m) was used for HPLC detection. The mobile phases were water (A)  
281 and acetonitrile (B). The elution gradient was as follows: 0–6 min, 20%–30% B; 6–15  
282 min, 30%–60% B; 15–21 min, 60%–100% B; 21–30 min, 100% B, 30–35 min, 100%–20%  
283 B. The flow rate was 1 mL/min, the column temperature was 30  $^{\circ}$ C, the injection volume  
284 was 10  $\mu$ L, and the detection wavelength was 210 nm. LC-TOF-MS was performed using  
285 the AB Sciex Tripletof 6600 (AB Sciex, Milford, MA, USA) in a positive ionization  
286 mode.

287 For the kinetic analysis of UGT73CR1, the reaction mixture contained 50 mM  
288 Tris–HCl (pH 8.0), 5 mM UDP-glucose, acceptor substrate (20–400  $\mu$ M diosgenin and  
289 pennogenin), and 1  $\mu$ g purified UGT73CR1 in a final volume of 100  $\mu$ L. The reaction  
290 was incubated at 37  $^{\circ}$ C for 30 min. HPLC analysis was used to quantify the target  
291 product in each reaction. The Michaelis–Menten parameters were calculated by kinetic  
292 model using Prism 7 (GraphPad, San Diego, CA, USA). All data are presented as means  
293  $\pm$  standard deviation of three independent experiments.

294

## 295 **RESULTS**

### 296 **Transcriptome sequencing, assembly, and functional annotation**

297 A total of 292.69 Gb clean data for 21 sequencing libraries, including three biological  
298 replicates of rhizome, fibrous root, stem, leaf, and ripe fruit and two biological replicates

299 of stigma, anther, and petals, were obtained by Illumina sequencing (Table S5). A total of  
300 81.81 Gb clean data containing 1,121,119 CCS reads were obtained from PacBio  
301 sequencing platform. Among them, 969,450 long reads belong to the full length non-  
302 chimeric sequence. The mean read length of CCS was 2,263 bp. The full-length non-  
303 chimeric sequences were clustered into 69,009 consensus sequences, and the consensus  
304 sequences were polished using Quiver to obtain 68,266 high-quality consensus sequences.  
305 The low-quality consensus sequences were further corrected using the Illumina short  
306 reads. After removing redundant sequences for the high-quality consensus sequences and  
307 corrected low-quality consensus sequences, 39,875 transcript sequences were finally  
308 obtained. Using BUSCO<sup>24</sup> to evaluate the integrity of the transcriptome, the results  
309 showed that complete and single-copy duplicated transcript sequences accounted for  
310 69.92%, the fragmented ones accounted for 5.97%, and those missing accounted for  
311 26.11%.

312 First, we compared the known data in the nr database, annotating 38,177 (95.74%)  
313 unigenes from 39,875 transcripts. Afterward, we performed comparisons in the Swissprot,  
314 eggNOG, KOG, and Pfam databases and annotated 29,475 (73.92%), 37,673 (94.48%),  
315 24,581 (61.65%), and 33,607 (84.28%) unigenes.

### 316 **Phylogenetic analysis of OSC, CYP, and UGT gene families**

317 In this study, we identified 2 intact OSCs, 216 CYPs, and 199 UGTs using PFAM  
318 annotation and BLAST algorithm. The phylogenetic tree of two OSCs from *P. polyphylla*  
319 var. *yunnanensis* and other 51 species showed that different branches distinguished the  
320 classification of OSC genes. The different OSC subfamilies are distributed in terms of  
321 various activities, especially for the skeletons of catalytic products, including

322 cycloartenol,  $\beta$ -amyrin, lanosterol, lupeol,  $\alpha$ -amyrin, friedelin, dammarenediol II, and  
323 mixed products (Figure 2a). Two identified OSC transcripts from *P. polyphylla* var.  
324 *yunnanensis* were classified into the CAS clade.

325 Phylogenetic analysis of CYPs using *Arabidopsis* as a reference indicated that all the full-  
326 length P450s from *P. polyphylla* var. *yunnanensis* can be assigned to CYP51, CYP71,  
327 CYP710, CYP711, CYP72, CYP74, CYP85, CYP86, and CYP97 family. Among them,  
328 the CYP71 (85) and CYP86 (60) families have the largest number of P450 genes,  
329 followed by the CYP85 (37) and CYP72 (21) families, whereas CYP710 (4), CYP97(4),  
330 CYP74 (2), CYP711 (2) and CYP51 (1) has the smallest number of P450 genes (Figures  
331 3a and S2).

332 The phylogenetic analysis of *P. polyphylla* var. *yunnanensis* UGTs was carried out  
333 together with the UGTs from *A. thaliana* and *Z. mays*, and the predicted UGT protein  
334 sequences of *P. polyphylla* var. *yunnanensis* were clustered into 13 of the 21 known UGT  
335 subfamilies<sup>25</sup>. The H, K, M, or N subfamilies of UGTs are lost in *P. polyphylla* var.  
336 *yunnanensis*. Among all the subfamilies, D is the largest phylogenetic group in *P.*  
337 *polyphylla* var. *yunnanensis*, containing 57 genes accounting for 28.64% of all UGTs  
338 (Figures 3a and S3).

### 339 **Metabolite and gene co-expression analysis to predict functional genes.**

340 According to the results in Figure S4, a soft threshold  $\beta = 9$  was selected to build a co-  
341 expression network. Then, the function hclust was used to perform hierarchical clustering  
342 on dissimilar matrices, whereas Dynamic Tree Cut was utilized to cut the generated  
343 cluster tree (Figure S5). In this process, unigenes with similar expression patterns can be  
344 combined on the same branch, and each branch represented a co-expression module, with

345 different colors representing various modules. Differential unigenes were correlated and  
346 clustered based on their FPKM values. Unigenes with a high correlation were assigned to  
347 the same module (Figure S6). In the end, 31,937 unigenes were divided into 26 modules,  
348 and the number of unigenes in the modules was 53–7667.

349 Using LC-MS-MS, we determined the production profiles of eight metabolites  
350 (cholesterol, diosgenin, trillin, prosapogenin A, polyphyllin I, polyphyllin II, polyphyllin  
351 VI, and polyphyllin VII) in different tissues of *P. polyphylla* var. *yunnanensis* (Figure 3c).  
352 Diosgenin and most of its related metabolites (prosapogenin A, polyphyllin I, and  
353 polyphyllin II) had relatively similar distribution patterns and were highly accumulated in  
354 rhizomes, leaf, ovary, and petal. The distribution of trillin was exceptionally higher in leaf  
355 than in other tissues. The accumulation of pennogenin-derived saponins in different  
356 tissues of *P. polyphylla* also showed similar patterns. Polyphyllin VI was highly  
357 accumulated in rhizomes, fibril, fruit, and ovary, whereas polyphyllin VII was highly  
358 accumulated in fibril, fruit, ovary, and petal. The distribution patterns of diverse  
359 polyphyllins and transcriptome data were integrated to construct a co-expression network  
360 of metabolic pathway genes and metabolites (Figure S7). The network can combine  
361 gene modules and metabolites with similar patterns in various tissues of *P. polyphylla* var.  
362 *yunnanensis* and calculate the correlation coefficient between metabolites and gene  
363 modules (Figure 3b). When the correlation coefficient approaches 1, the metabolites and  
364 genes in the module show similar expression or distribution patterns in different tissues  
365 of *P. polyphylla* var. *yunnanensis*.

366 Based on the correlation coefficient, we observed that trillin clustered well with the  
367 lavenderblush3 (0.82), lightblue3 (0.72), and white (0.73) modules in the co-expression



368 network. Polyphyllin I had the highest correlation with Coral (0.72) and orangered4 (0.7)  
369 modules, and polyphyllin VII showed a high correlation with antiquewhite4 (0.81) and  
370 antiquewhite1 (0.76). Diosgenin and cholesterol were correlated with the antiquewhite4  
371 module, and the correlation coefficients were 0.66 and 0.65, respectively. Polyphyllin II  
372 was correlated with lavenderblush3 (0.64) module, but polyphyllin VI and prosapogenin  
373 A showed no specific correlation with a certain module. The clustering results indicated  
374 that the genes in the orangered4, lavenderblush3, lightblue3, coral, antiquewhite1, white,  
375 and antiquewhite4 modules are likely to be involved in the biosynthesis of polyphyllins.  
376 Furthermore, we analyzed the upstream genes involved in the metabolic pathways of  
377 cholesterol or other phytosterols in the above seven modules. The coral, antiquewhite4,  
378 and lavenderblush3 modules contained relatively rich sterol synthesis upstream genes (14,  
379 21, and 11, respectively) (Table S6). However, the orange, lightblue3, white, and  
380 antiquewhite1 modules contained less sterol synthesis upstream genes (0, 0, 4, and 6,  
381 respectively). Based on the results, the genes contained in the coral, antiquewhite4, and  
382 lavenderblush3 modules are likely to play a key role in the biosynthesis of polyphyllins,  
383 and subsequent gene prediction will be developed around these three modules.

384 From the three predicted modules, we obtained 42 CYPs and 48 UGTs. Heat maps  
385 were plotted to show the expression patterns of these genes in different tissues (Figure  
386 4a). Genes involved in specialized metabolites biosynthesis often show high expression  
387 levels in certain tissues. Therefore, among the genes that have been predicted in our  
388 correlation analysis, the *CYP* and *UGT* genes with high expression levels in polyphyllins  
389 that accumulated tissues are likely to participate in the biosynthesis of polyphyllins.

390 In addition, we predicted the candidate *CYP* and *UGT* genes using phylogenetic

391 analysis. P450s that can be hydroxylate in triterpene or steroidal skeletons often belong to  
392 the CYP72, CYP90, and CYP94 families. Based on our phylogenetic tree, we detected 21,  
393 11, and 28 genes from the CYP72, CYP90, and CYP94 families, respectively. The UGTs  
394 that can add a glycosyl group at the C-3 position of triterpenoid and steroidal aglycone  
395 belong to the UGT73 family. A total of 57 UGT73s were annotated from our  
396 transcriptome data. Through combinational analysis of phylogenetic tree and WGCNA,  
397 we narrowed the *CYPs* and *UGTs* to 15 and 24 candidate genes, respectively (Figure 4b).  
398 Among them, three *CYP* genes, namely, *PpCYP90G4* (F01\_transcript/40556),  
399 *PpCYP90B27* (F01\_transcript/40246), and *PpCYP72A616* (F01\_transcript/40246), have  
400 been reported to be involved in the biosynthesis of polyphyllins. These three genes  
401 ranked the 1st, 3rd, and 6th place in the list of candidate genes, respectively. These  
402 candidate genes are very likely to be involved in the biosynthesis of polyphyllins. The  
403 genes that appeared in the candidate clades of phylogenetic tree but were not included in  
404 the candidate modules of WGCNA should not be ignored. They may also include some  
405 ~~genes~~ be involved in the biosynthesis of polyphyllins. All candidate *OSC*, *CYP*, and *UGT*  
406 genes can be found in Supplementary File 2.

#### 407 **PpOSC1 but not PpOSC2 catalyzes the conversion of 2,3-oxidesqualene to cyclic** 408 **triterpenes**

409 *OSC* is one of the key enzymes in steroid biosynthesis [12,13], and the *OSC*-catalyzed  
410 conversion of 2,3-oxidesqualene to cyclic triterpenes marks the first scaffold  
411 diversification reaction in triterpenoid and steroid pathways. In contrast to single-copy  
412 *OSC* gene in lower plants, higher plants always have multiple *OSC* genes in their genomes  
413 <sup>86</sup>. A total of 13 *OSC*-related transcriptome variants were found in the transcriptome,

414 which may represent two non-redundant *OSCs* (*PpOSC1* and *PpOSC2*). To investigate  
415 the activity of the two candidates, we cloned two genes transferred them into optimized  
416 yeast strains (SQSQ-pPOSC1 and SQSQ-pPOSC2). Cycloartenol production was  
417 evidently observed in the SQ-PPOSC1 strains, whereas it was absent in SQ-PPOSC2  
418 strains, suggesting that *PpOSC1* gene encodes *CAS* in *P. polyphylla* var. *yunnanensis*  
419 (Figure 2b). Furthermore, *PpOSC1* and *PpOSC2* genes were transfected into *A.*  
420 *tumefaciens* for infected *N. benthamiana* leaf infiltration. Similarly, after infiltration, we  
421 collected the leaves and verified the function of *OSC* genes by measuring the content of  
422 triterpenes. The results showed that the instantaneous expression of *PpOSC1* can  
423 facilitate the production with 3.12-fold more cycloartenol, whereas *PpOSC2* could not  
424 increase the content of cycloartenol but can increase that of an uncharacterized triterpene  
425 product instead (Figure S8). Therefore, the *PpOSC1* gene plays an important function in  
426 the biosynthesis of polyphyllin.

#### 427 ***PpUGT73CR1* functions as a glucotransferase at the C-3 position of diosgenin and** 428 **pennogenin**

429 In the candidate UGTs, transcript/33044 showed the activity of C-3 glucosyltransferase  
430 named *PpUGT73CR1*. In the phylogenetic tree, *PpUGT73CR1* is in the same branch with  
431 *BvUGT73CR10* and *BvUGT73CR10*, which can glycosylate the C-3 position of  $\beta$ -  
432 amyryn<sup>26</sup>. The coding sequence length of the gene is 1473 bp, encoding a UGT with 490  
433 amino acid residues. The molecular weight of the protein is 54.48 kDa, and the molecular  
434 weight of the fusion protein with GST tag is 81.68 kDa (Figure 4c). When diosgenin was  
435 used as a sugar acceptor, the enzyme encoded by *PpUGT73CR1* can catalyze diosgenin  
436 to produce a polar product after the addition of UDP-glucose. The HPLC retention time

437 of the product was 22.1 min, which was consistent with that of trillin. When pennogenin  
438 was used as the sugar acceptor, PpUGT73CR1 converted pennogenin into a new product  
439 with the retention time at 18.9 min. The LC-TOF-MS analysis showed that the molecular  
440 weight of the new product was 593.37 [M+H]<sup>+</sup>, which was consistent with the molecular  
441 weight of floribundasaponin A (Figure 4d). Supplementary File 3 shows the hydrogen  
442 and carbon spectrum results of the substrate (pennogenin) and reaction product  
443 (floribundasaponin A).

444 To study the promiscuity of UGT to diverse substrates, we evaluated the catalytic  
445 capability of PpUGT73CR1 on diosgenin and pennogenin. Subsequently, the enzymatic  
446 kinetics of PpUGT73CR1 catalyzing different substrates were studied (Table 1). The  
447 maximum reaction velocity ( $V_{max}$ ) of diosgenin and pennogenin were  $177.13 \pm 8.91$  and  
448  $87.7 \pm 3.27$  nmol/min/mg, respectively. Michaelis constant ( $K_m$ ) reflected the affinity  
449 between the enzyme and substrate to a certain extent. Compared with pennogenin ( $K_m =$   
450  $73.43 \pm 8.16$   $\mu$ M), PpUGT73CR1 had a higher affinity for diosgenin ( $K_m = 53.69 \pm 9.37$   
451  $\mu$ M). The enzymatic catalytic constant ( $K_{cat}$ ) of PpUGT73CR1 for diosgenin and  
452 pennogenin were 0.24 and 0.12 s<sup>-1</sup>, respectively, and the calculated conversion  
453 efficiencies ( $K_{cat}/K_m$ ) were 4.47 (diosgenin) and 1.62 (pennogenin) mM<sup>-1</sup>·s<sup>-1</sup>. Thus, the  
454 catalytic efficiency of PpUGT73CR1 for diosgenin was higher than that of pennogenin.

455

## 456 DISCUSSION

457 Medicinal plants are rich in a variety of metabolites with pharmacological  
458 properties. However, studies on the biosynthetic pathways of these metabolites are still  
459 limited due to the complexity of plant genomes and the lack of genomic resources.

460 Unlike microorganisms, functional gene clusters are rare in plants, and gene redundancy  
461 and strict genetic regulation in plants cause difficulty in parsing metabolic pathways<sup>27</sup>. At  
462 present, botanists mainly use multi-omics methods to analyze the biological pathways of  
463 metabolites. However, in the absence of genomic data, this prediction method often  
464 yields a large number of false positive results. For the majority of medicinal plants, an  
465 accurate method is needed to predict metabolite biosynthesis pathways without genomic  
466 data or metabolic biosynthesis clusters. The research on the biosynthesis of polyphyllin  
467 has been a hot topic because of its various pharmacological activities. Given the huge  
468 genome, no data report is currently available on the genome of *P. polyphylla* var.  
469 *yunnanensis*. At this stage, transcriptome sequencing is the most suitable method to study  
470 the biosynthesis pathway of polyphyllin.

471 Several studies reported the transcriptome data of *P. polyphylla*<sup>6,14,15,28</sup>. However, these  
472 transcriptome measurements were all based on Illumina platform and cannot reflect well  
473 the complete transcriptome information of *P. polyphylla* var. *yunnanensis*. Published  
474 transcriptome information was mainly derived from roots, stems, and leaves of the plant,  
475 with little transcriptome information for other tissues, which is insufficient to predict  
476 polyphyllin biosynthesis pathway genes using the association analysis of gene expression  
477 and metabolites. In this study, we collected samples from eight tissues of *P. polyphylla*  
478 var. *yunnanensis* to complete the splicing and full-length transcriptome sequencing, and  
479 more than 370 G clean data were obtained. The transcriptome data in our study obtained  
480 the most diversity in tissues and deepest sequencing depth among all transcriptome  
481 experiments in *P. polyphylla* var. *yunnanensis*. Compared with previous reports of  
482 sequencing, it can avoid redundant data and splicing errors and provide data support for

483 the accurate prediction of the biosynthetic pathway of polyphyllin.

484 We-constructed a co-expression network of metabolites with gene expression levels in  
485 different tissue of *P. polyphylla* var. *yunnanensis*. We measured the contents of key  
486 metabolites related to polyphyllin synthesis in various tissues of *P. polyphylla* var.  
487 *yunnanensis*, including cholesterol, diosgenin, trillin, prosapogenin A, polyphyllins I, II,  
488 VI, and VII.-We predicted three modules that are highly relevant to the above metabolites.  
489 We further conducted conditional screening through phylogenetic trees and gene  
490 expression levels and obtained reliable candidate genes, including three reported key *CYP*  
491 genes involved in the biosynthesis of polyphyllins. We also identified an *OSC* gene  
492 responsible for cycloartenol biosynthesis and a *UGT* gene with C-3 glucosyltransferase  
493 function from *P. polyphylla* var. *yunnanensis*. Among the predicted modules, the coral  
494 module showed a strong correlation only with polyphyllin I, whereas the lavenderblush3  
495 and antiquewhite4 modules exhibited more correlations with cholesterol, diosgenin, and  
496 trillin. This finding suggests that the genes contained in the coral module may be more  
497 involved in the formation of hydroxylation and glycosylation of polyphyllins. The  
498 predicted results also proved our speculation that the three predicted *CYP* genes with  
499 clear function and the C-3 glucosyltransferase gene of polyphyllins (*PpUGT73CR1*) all  
500 come from the coral module. These results showed the accuracy and reliability of this  
501 prediction method.

502 Several studies focused on glycosylation modification of steroidal sapogenins. A C-3  
503 glucosyltransferase SAGT4a in *Solanum aculeatissimum* shows the glycosylation activity  
504 of diosgenin, nuatigenin, tigogenin, and other glycosyltransferases<sup>29</sup>. In this study, c-3  
505 glucosyltransferases of diosgenin and pennogenin were found in in *P. polyphylla* var.

506 *yunnanensis*. According to the study of substrate promiscuity and enzyme kinetics,  
507 PpUGT73CR1 had a better affinity and catalytic capability with diosgenin compared with  
508 pennogenin.

509 At present, the analysis of steroidal sapogenin biosynthetic pathways is progressing  
510 slowly and remains in the exploratory stage. Research has focused on the cloning and  
511 regulation of functional genes upstream of terpenoid biosynthetic pathways, such as  
512 HMGR, FPS, SS, CAS, etc.<sup>30,31</sup>, and several P450s. Other research reported the  
513 glycosylation modification of diosgenin. Therefore, the key genes involved in the  
514 biosynthesis pathway of polyphyllin can be possibly predicted by using our prediction  
515 method combining the evolutionary tree, co-expression network, and gene expression  
516 quantity. This method is also generally applicable to the prediction of key genes in plants  
517 lacking genome data.

518

## 519 **CONCLUSION**

520 Polyphyllin has a variety of pharmacological activities, but the analysis of the  
521 biosynthetic pathway of polyphyllin is incomplete. We performed splicing and full-length  
522 transcriptome sequencing of rhizomes, fibrous roots, stems, leaves, ripe fruits, stigma,  
523 petals, and pistil tissues of *Paris polyphylla* var. *yunnanensis*, and the gene expression  
524 and WGCNA method were used to predict the OSCs, CYPs, and UGTs involved in the  
525 biosynthesis of sapogenin. Among the predicted candidate genes, we identified an *OSC*  
526 gene (*PpOSCI*) and a diosgenin/pennogenin C-3 UGT gene (*PpUGT73CR1*) for the first  
527 time. This study improves our understanding of the biosynthetic pathways of polyphyllins,  
528 providing a basis for further elucidation of the pharmacologically active

529 triterpene/sapogenin biosynthesis and an efficient strategy to study the complex pathway  
530 of other specialized plant metabolites.

531

## 532 **ACKNOWLEDGEMENTS**

533 This work was supported by the program for Natural Science Foundation of  
534 Heilongjiang Province of China (YQ2020C020), Opening Project of Zhejiang Provincial  
535 Preponderant and Characteristic Subject of Key University (Traditional Chinese  
536 Pharmacology), the Zhejiang Chinese Medical University (No. ZYAOX2018012), the  
537 National Natural Science Foundation of China (NSFC Grant No.31770332, 31970314),  
538 National Key R&D Program of China (2019YFC1711103), and the Fundamental  
539 Research Funds for the Central Universities (2572020BD01) and Key project at central  
540 government level: The ability establishment of sustainable use for valuable Chinese  
541 medicine resources (2060302-2101-17).

542 The authors also acknowledge the technical support of Dr. Shengnan Tan from  
543 Analysis and Test Center, Northeast Forestry University.

544

## 545 **AUTHOR CONTRIBUTIONS**

546 Z, X and X.H designed the experiments and coordinated the project. K.W, X.Y and C.H  
547 performed the samples collection, phylogenetic tree, OSC function, transcriptomic and  
548 metabolomic analyses. X.H wroted and edited most of the manuscript. B,D edited the  
549 language. All authors have read and approved the final manuscript.

550

## 551 **DATA AVAILABILITY STATEMENT**



552 Raw reads have been deposited as a BioProject under accession PRJCA004404  
553 ([https://bigd.big.ac.cn/bioproject/browse/ PRJCA004404](https://bigd.big.ac.cn/bioproject/browse/PRJCA004404)).

554

#### 555 **COMPETING INTERESTS**

556 The authors declare that they have no conflict of interest. Supplementary Information  
557 accompanies this paper at website.

558

559

560

561

562

563

564

565

566

567

568

569

570

571

572

573

574

575

576 **REFERENCES**

- 577 1 Tang, M. J., Zhao, J., Li, X. H. & Yu, S. S. [Advances in studies on chemical  
578 constituents and pharmacological activities from plants of Symplocaceae]. *China  
579 journal of Chinese materia medica* **29**, 390-394 (2004).
- 580 2 Wang, Y., Zhang, Y. J., Gao, W. Y. & Yan, L. L. [Anti-tumor constituents from  
581 Paris polyphylla var. yunnanensis]. *China journal of Chinese materia medica* **32**,  
582 1425-1428 (2007).
- 583 3 Guo, L. *et al.* Active pharmaceutical ingredients and mechanisms underlying  
584 phasic myometrial contractions stimulated with the saponin extract from Paris  
585 polyphylla Sm. var. yunnanensis used for abnormal uterine bleeding. *Human  
586 reproduction* **23**, 964-971, doi:10.1093/humrep/den001 (2008).
- 587 4 Qin, X. J. *et al.* Steroidal saponins with antimicrobial activity from stems and  
588 leaves of Paris polyphylla var. yunnanensis. *Steroids* **77**, 1242-1248,  
589 doi:10.1016/j.steroids.2012.07.007 (2012).
- 590 5 Negi, J. S. *et al.* Paris polyphylla: chemical and biological prospectives. *Anti-  
591 cancer agents in medicinal chemistry* **14**, 833-839,  
592 doi:10.2174/1871520614666140611101040 (2014).
- 593 6 Yin, Y., Gao, L., Zhang, X. & Gao, W. A cytochrome P450 monooxygenase  
594 responsible for the C-22 hydroxylation step in the Paris polyphylla steroidal  
595 saponin biosynthesis pathway. *Phytochemistry* **156**, 116-123,  
596 doi:10.1016/j.phytochem.2018.09.005 (2018).
- 597 7 Shuli, M. *et al.* Paridis saponins inhibiting carcinoma growth and metastasis in

- 598 vitro and in vivo. *Archives of pharmacal research* **34**, 43-50, doi:10.1007/s12272-  
599 011-0105-4 (2011).
- 600 8 Patel, K., Gadewar, M., Tahilyani, V. & Patel, D. K. A review on pharmacological  
601 and analytical aspects of diosmetin: a concise report. *Chinese journal of*  
602 *integrative medicine* **19**, 792-800, doi:10.1007/s11655-013-1595-3 (2013).
- 603 9 Thimmappa, R., Geisler, K., Louveau, T., O'Maille, P. & Osbourn, A. Triterpene  
604 biosynthesis in plants. *Annual review of plant biology* **65**, 225-257,  
605 doi:10.1146/annurev-arplant-050312-120229 (2014).
- 606 10 Cardenas, P. D. *et al.* The bitter side of the nightshades: Genomics drives  
607 discovery in Solanaceae steroidal alkaloid metabolism. *Phytochemistry* **113**, 24-32,  
608 doi:10.1016/j.phytochem.2014.12.010 (2015).
- 609 11 Lu, Y. *et al.* Regulation of the cholesterol biosynthetic pathway and its integration  
610 with fatty acid biosynthesis in the oleaginous microalga *Nannochloropsis*  
611 *oceanica*. *Biotechnology for biofuels* **7**, 81, doi:10.1186/1754-6834-7-81 (2014).
- 612 12 Christ, B. *et al.* Repeated evolution of cytochrome P450-mediated spiroketal  
613 steroid biosynthesis in plants. *Nature communications* **10**, 3206,  
614 doi:10.1038/s41467-019-11286-7 (2019).
- 615 13 Morozova, O., Hirst, M. & Marra, M. A. Applications of new sequencing  
616 technologies for transcriptome analysis. *Annual review of genomics and human*  
617 *genetics* **10**, 135-151, doi:10.1146/annurev-genom-082908-145957 (2009).
- 618 14 Liu, T., Li, X., Xie, S., Wang, L. & Yang, S. RNA-seq analysis of *Paris polyphylla*  
619 var. *yunnanensis* roots identified candidate genes for saponin synthesis. *Plant*  
620 *diversity* **38**, 163-170, doi:10.1016/j.pld.2016.05.002 (2016).

- 621 15 Yang, Z. *et al.* Transcriptome analyses of *Paris polyphylla* var. *chinensis*,  
622 *Ypsilandra thibetica*, and *Polygonatum kingianum* characterize their steroidal  
623 saponin biosynthesis pathway. *Fitoterapia* **135**, 52-63,  
624 doi:10.1016/j.fitote.2019.04.008 (2019).
- 625 16 Han, J. Y., In, J. G., Kwon, Y. S. & Choi, Y. E. Regulation of ginsenoside and  
626 phytosterol biosynthesis by RNA interferences of squalene epoxidase gene in  
627 *Panax ginseng*. *Phytochemistry* **71**, 36-46, doi:10.1016/j.phytochem.2009.09.031  
628 (2010).
- 629 17 Rai, A., Saito, K. & Yamazaki, M. Integrated omics analysis of specialized  
630 metabolism in medicinal plants. *The Plant journal : for cell and molecular*  
631 *biology* **90**, 764-787, doi:10.1111/tpj.13485 (2017).
- 632 18 Mylona, P. *et al.* Sad3 and sad4 are required for saponin biosynthesis and root  
633 development in oat. *Plant Cell* **20**, 201-212, doi:10.1105/tpc.107.056531 (2008).
- 634 19 Shang, Y. *et al.* Plant science. Biosynthesis, regulation, and domestication of  
635 bitterness in cucumber. *Science* **346**, 1084-1088, doi:10.1126/science.1259215  
636 (2014).
- 637 20 Xu, J. *et al.* *Panax ginseng* genome examination for ginsenoside biosynthesis.  
638 *Gigascience* **6**, 1-15, doi:10.1093/gigascience/gix093 (2017).
- 639 21 Jiang, Z. *et al.* The chromosome-level reference genome assembly for *Panax*  
640 *notoginseng* and insights into ginsenoside biosynthesis. *Plant Commun* **2**, 100113,  
641 doi:10.1016/j.xplc.2020.100113 (2021).
- 642 22 Kumar, S., Stecher, G. & Tamura, K. MEGA7: Molecular Evolutionary Genetics  
643 Analysis Version 7.0 for Bigger Datasets. *Mol Biol Evol* **33**, 1870-1874,

- 644           doi:10.1093/molbev/msw054 (2016).
- 645   23   Langfelder, P. & Horvath, S. WGCNA: an R package for weighted correlation  
646       network analysis. *BMC Bioinformatics* **9**, 559, doi:10.1186/1471-2105-9-559  
647       (2008).
- 648   24   Seppey, M., Manni, M. & Zdobnov, E. M. BUSCO: Assessing Genome Assembly  
649       and Annotation Completeness. *Methods in molecular biology* **1962**, 227-245,  
650       doi:10.1007/978-1-4939-9173-0\_14 (2019).
- 651   25   Wilson, A. E. & Tian, L. Phylogenomic analysis of UDP-dependent  
652       glycosyltransferases provides insights into the evolutionary landscape of  
653       glycosylation in plant metabolism. *The Plant journal : for cell and molecular*  
654       *biology* **100**, 1273-1288, doi:10.1111/tpj.14514 (2019).
- 655   26   Augustin, J. M. *et al.* UDP-Glycosyltransferases from the UGT73C Subfamily in  
656       Barbarea vulgaris Catalyze Sapogenin 3-O-Glucosylation in Saponin-Mediated  
657       Insect Resistance. *Plant physiology* **160**, 1881-1895, doi:10.1104/pp.112.202747  
658       (2012).
- 659   27   Karaiskos, I., Souli, M., Galani, I. & Giamarellou, H. Colistin: still a lifesaver for  
660       the 21st century? *Expert opinion on drug metabolism & toxicology* **13**, 59-71,  
661       doi:10.1080/17425255.2017.1230200 (2017).
- 662   28   Qi, J. *et al.* Mining genes involved in the stratification of Paris polyphylla seeds  
663       using high-throughput embryo transcriptome sequencing. *BMC genomics* **14**, 358,  
664       doi:10.1186/1471-2164-14-358 (2013).
- 665   29   Kohara, A. *et al.* A novel glucosyltransferase involved in steroid saponin  
666       biosynthesis in Solanum aculeatissimum. *Plant molecular biology* **57**, 225-239,

667 doi:10.1007/s11103-004-7204-2 (2005).

668 30 Babiychuk, E. *et al.* Albinism and cell viability in cycloartenol synthase deficient  
669 Arabidopsis. *Plant signaling & behavior* **3**, 978-980, doi:10.4161/psb.6173  
670 (2008).

671 31 Kumar, S. *et al.* RNA-Seq mediated root transcriptome analysis of *Chlorophytum*  
672 *borivillianum* for identification of genes involved in saponin biosynthesis.  
673 *Functional & integrative genomics* **16**, 37-55, doi:10.1007/s10142-015-0465-9  
674 (2016).

675

676

677

678

679

680

681

682

683

684

685

686

687

688

689

690

691 **Figure legends**

692 **Figure 1. Possible biosynthetic pathways of polyphyllin in *P. polyphylla* var.**

693 *yunnanensis*. The established metabolic pathways are represented by solid

694 line arrows, while the speculated metabolic pathways are represented by

695 dotted line arrows. Genes predicted by transcriptome, metabolite profile and

696 WGCAN analysis are shown in yellow background, and those identified by

697 this method are shown in blue background.

698 **Figure 2. Candidate OSC genes and gene function verification. (a)** Phylogenetic tree

699 of OSCs. Predicted amino acid sequences of OSCs in *P. polyphylla* var.

700 *yunnanensis* were aligned with selected OSCs from other plant species using

701 MUSCLE. The evolutionary history was inferred using the maximum

702 likelihood method. The bootstrap consensus tree inferred from 1000

703 replicates is taken to represent the evolutionary history of the taxa analyzed.

704 **(b)** Functional verification of *PpOSC* gene. Two OSC genes were identified

705 in *P. polyphylla* var. *yunnanensis*, and the results of GC-MS showed that

706 *PpOSC1* gene increased the yield of cycloartenol after being transferred to

707 *N.benthamiana*.

708 **Figure 3. Using phylogenetic tree, metabolic profile and WGCAN analysis to predict**

709 **that the key genes involved in the biosynthesis of polyphyllin in *P.***

710 *polyphylla* var. *yunnanensis*. **(a)** Phylogenetic tree of CYPs and UGTs. **(b)**

711 Module–trait associations. Each row corresponds to a module of characteristic

712 genes, and each column corresponds to a metabolite. Each cell contains the

713 correlation and p value of the genes in the module with the corresponding  
714 metabolite. (c) The production profiles of key metabolites involved in the  
715 biosynthetic pathway of polyphyllin in different tissues. The quantification of  
716 Polyphyllins contents was carried out in three separate experiments, in which  
717 each sample came from different mixtures of 4 plants.

718 **Figure 4. Candidate CYP and UGT genes and gene function verification.** (a)  
719 Heatmaps of the expression levels of candidate CYPs and UGTs in different  
720 tissues of *P. polyphylla* var. *yunnanensis*. All genes are arranged from top to  
721 bottom according to the total expression level. The asterisks represent key  
722 genes predicted by the evolutionary tree, WGCAN and gene expression. (b)  
723 Venn diagrams of candidate genes. Phylogenetic tree and WGCAN methods  
724 were used to predict candidate CYPs and UGTs, among which 15 and 20  
725 CYPs and UGTs could be predicted by the two methods, respectively. (c)  
726 SDS-PAGE analysis of expressed PpUGT73CR1 protein. *Lanes*: M, protein  
727 molecular weight marker (Thermo fisher); 1, pGEX-6p-1 vector transformed  
728 in *E. coli* Rosetta (DE3) cells with IPTG induction; 2, pGEX-*UGT73CR1*  
729 vector transformed in *E. coli* Rosetta (DE3) cells without IPTG induction; 3,  
730 pGEX-*UGT73CR1* vector transformed in *E. coli* Rosetta (DE3) cells with  
731 IPTG induction; 4, the purified recombinant protein of PpUGT73CR1. (d)  
732 Functional verification of *PpUGT73CR1* gene. The functional verification of  
733 candidate UGTs was performed by HPLC and LC-TOF-MS, and the enzyme  
734 encoded by *PpUGT73CR1* gene could introduce glucose group into C-3 of  
735 diosgenin and pannogenin.



736

737 **Table 1.** The enzymatic kinetics of PpUGT73C1 catalyzed diosgenin and pennogenin.

738

| enzyme    | substrate  | $V_{\max}$ ( $\mu\text{M}/\text{min}$ ) | $K_m$ ( $\mu\text{M}$ ) | $K_{\text{cat}}$ ( $\text{s}^{-1}$ ) | $K_{\text{cat}} / K_m$ ( $\text{s}^{-1} \cdot \text{mM}^{-1}$ ) |
|-----------|------------|-----------------------------------------|-------------------------|--------------------------------------|-----------------------------------------------------------------|
| PpUGT73C1 | diosgenin  | $1.771 \pm 0.089$                       | $53.69 \pm 9.37$        | 0.24                                 | 4.47                                                            |
|           | pennogenin | $0.877 \pm 0.033$                       | $73.43 \pm 8.16$        | 0.12                                 | 1.62                                                            |

739

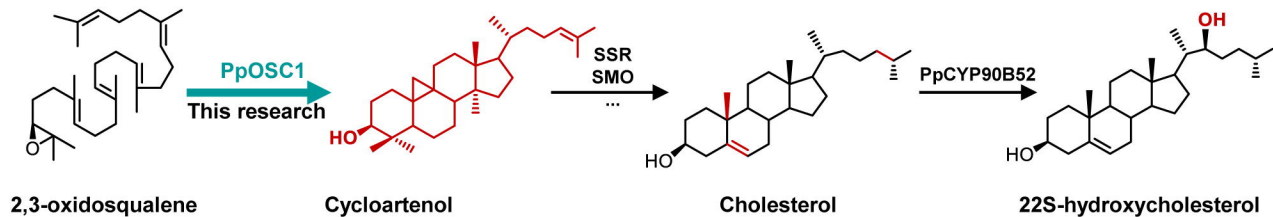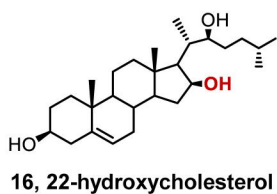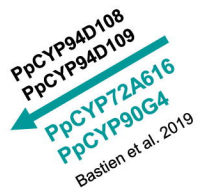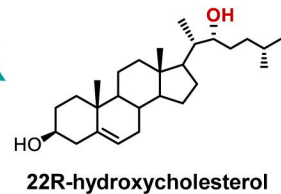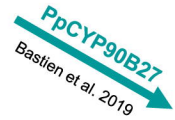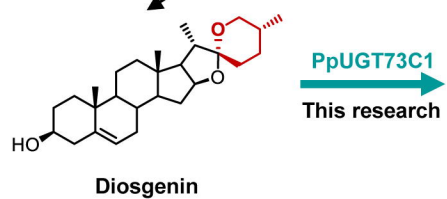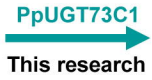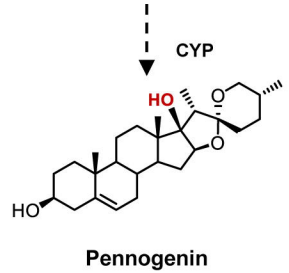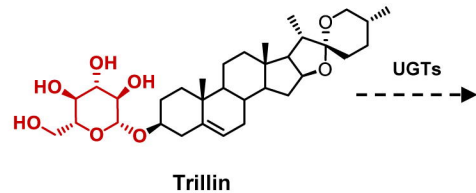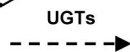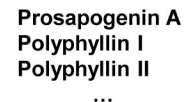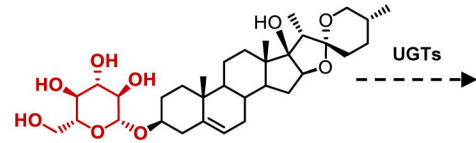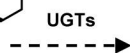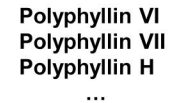

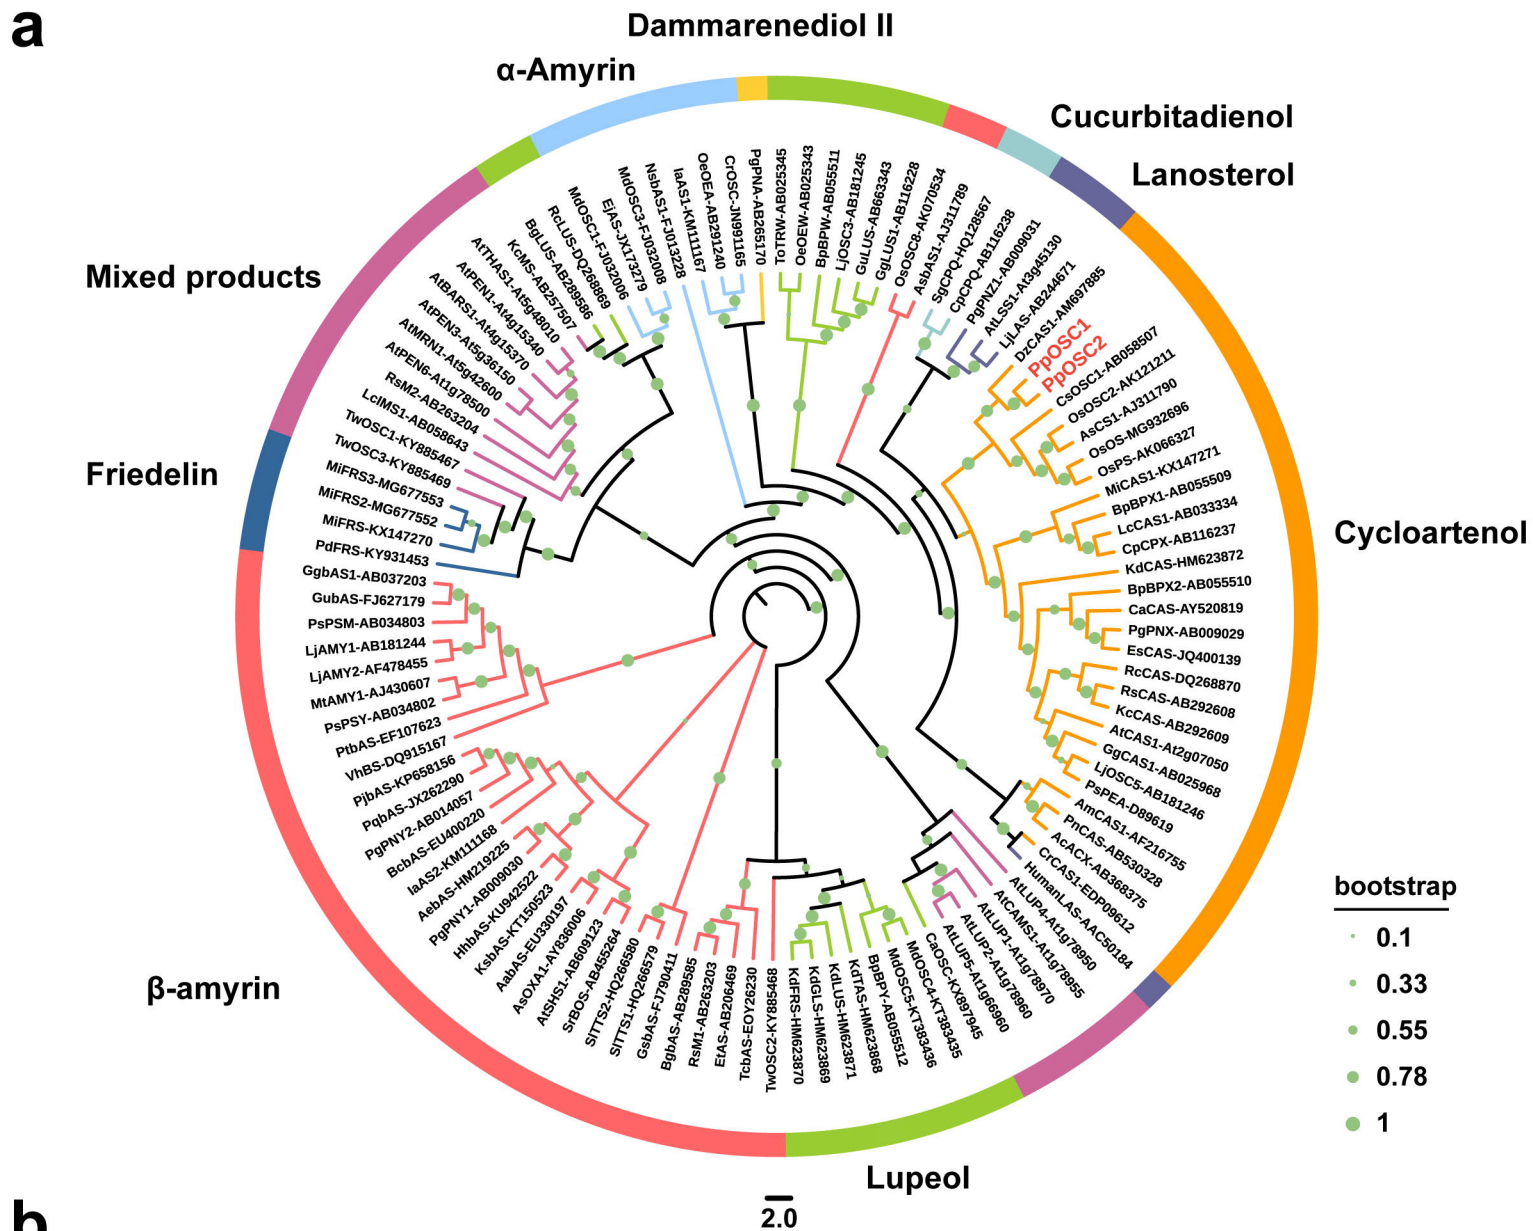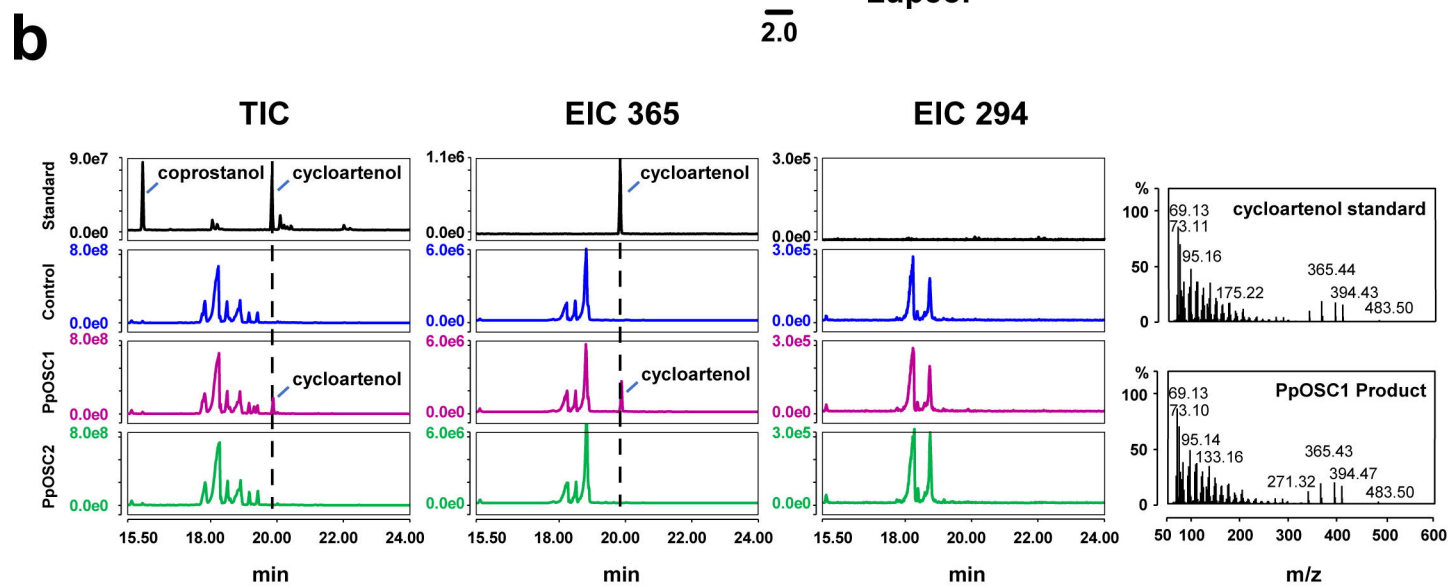

**a****CYPs****UGTs**

bootstrap

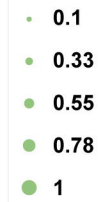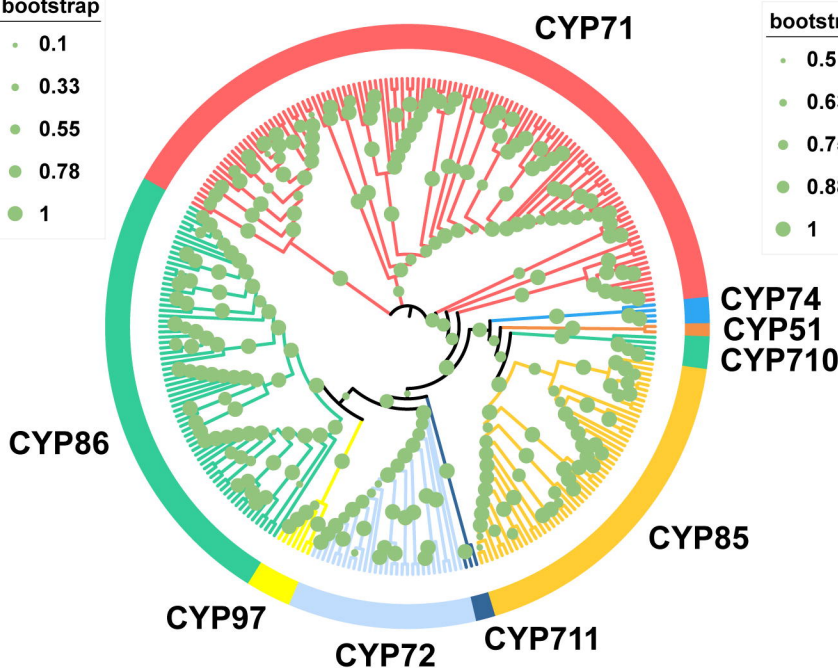

bootstrap

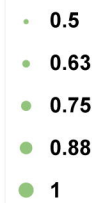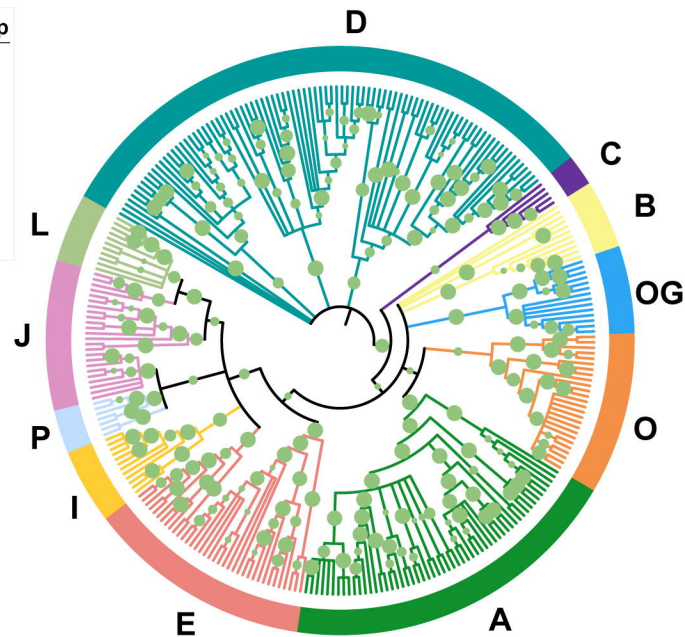**b****Module-trait relationships**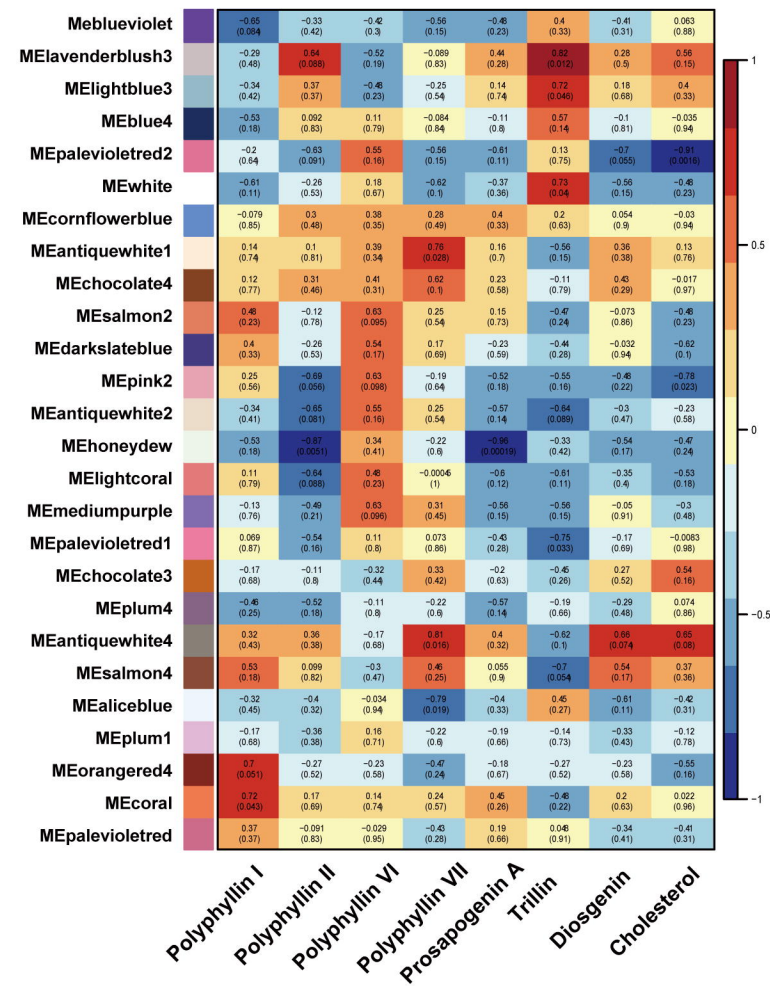**c**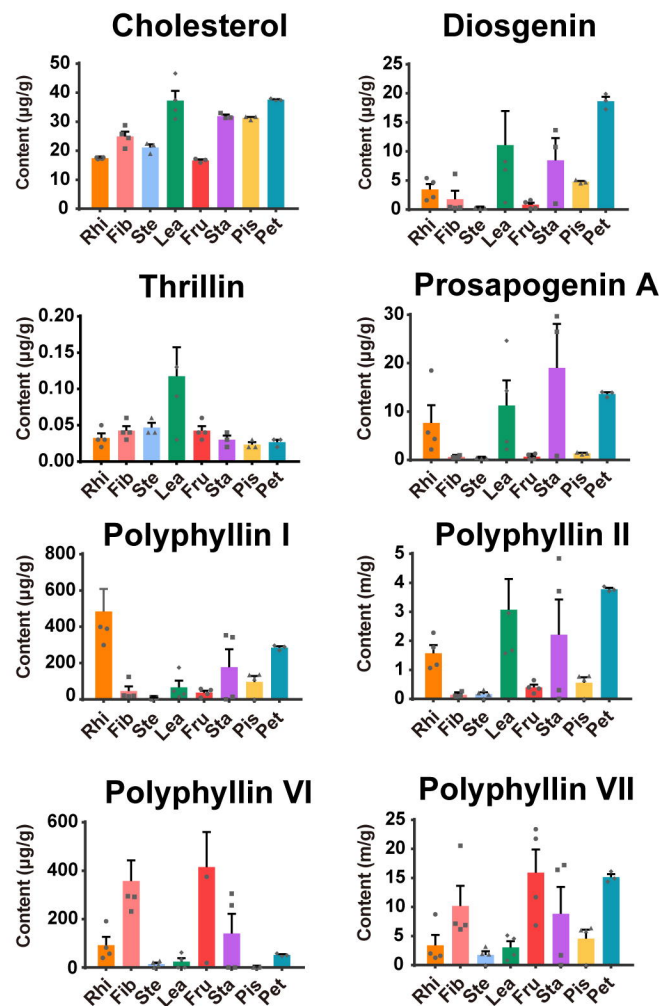



**a**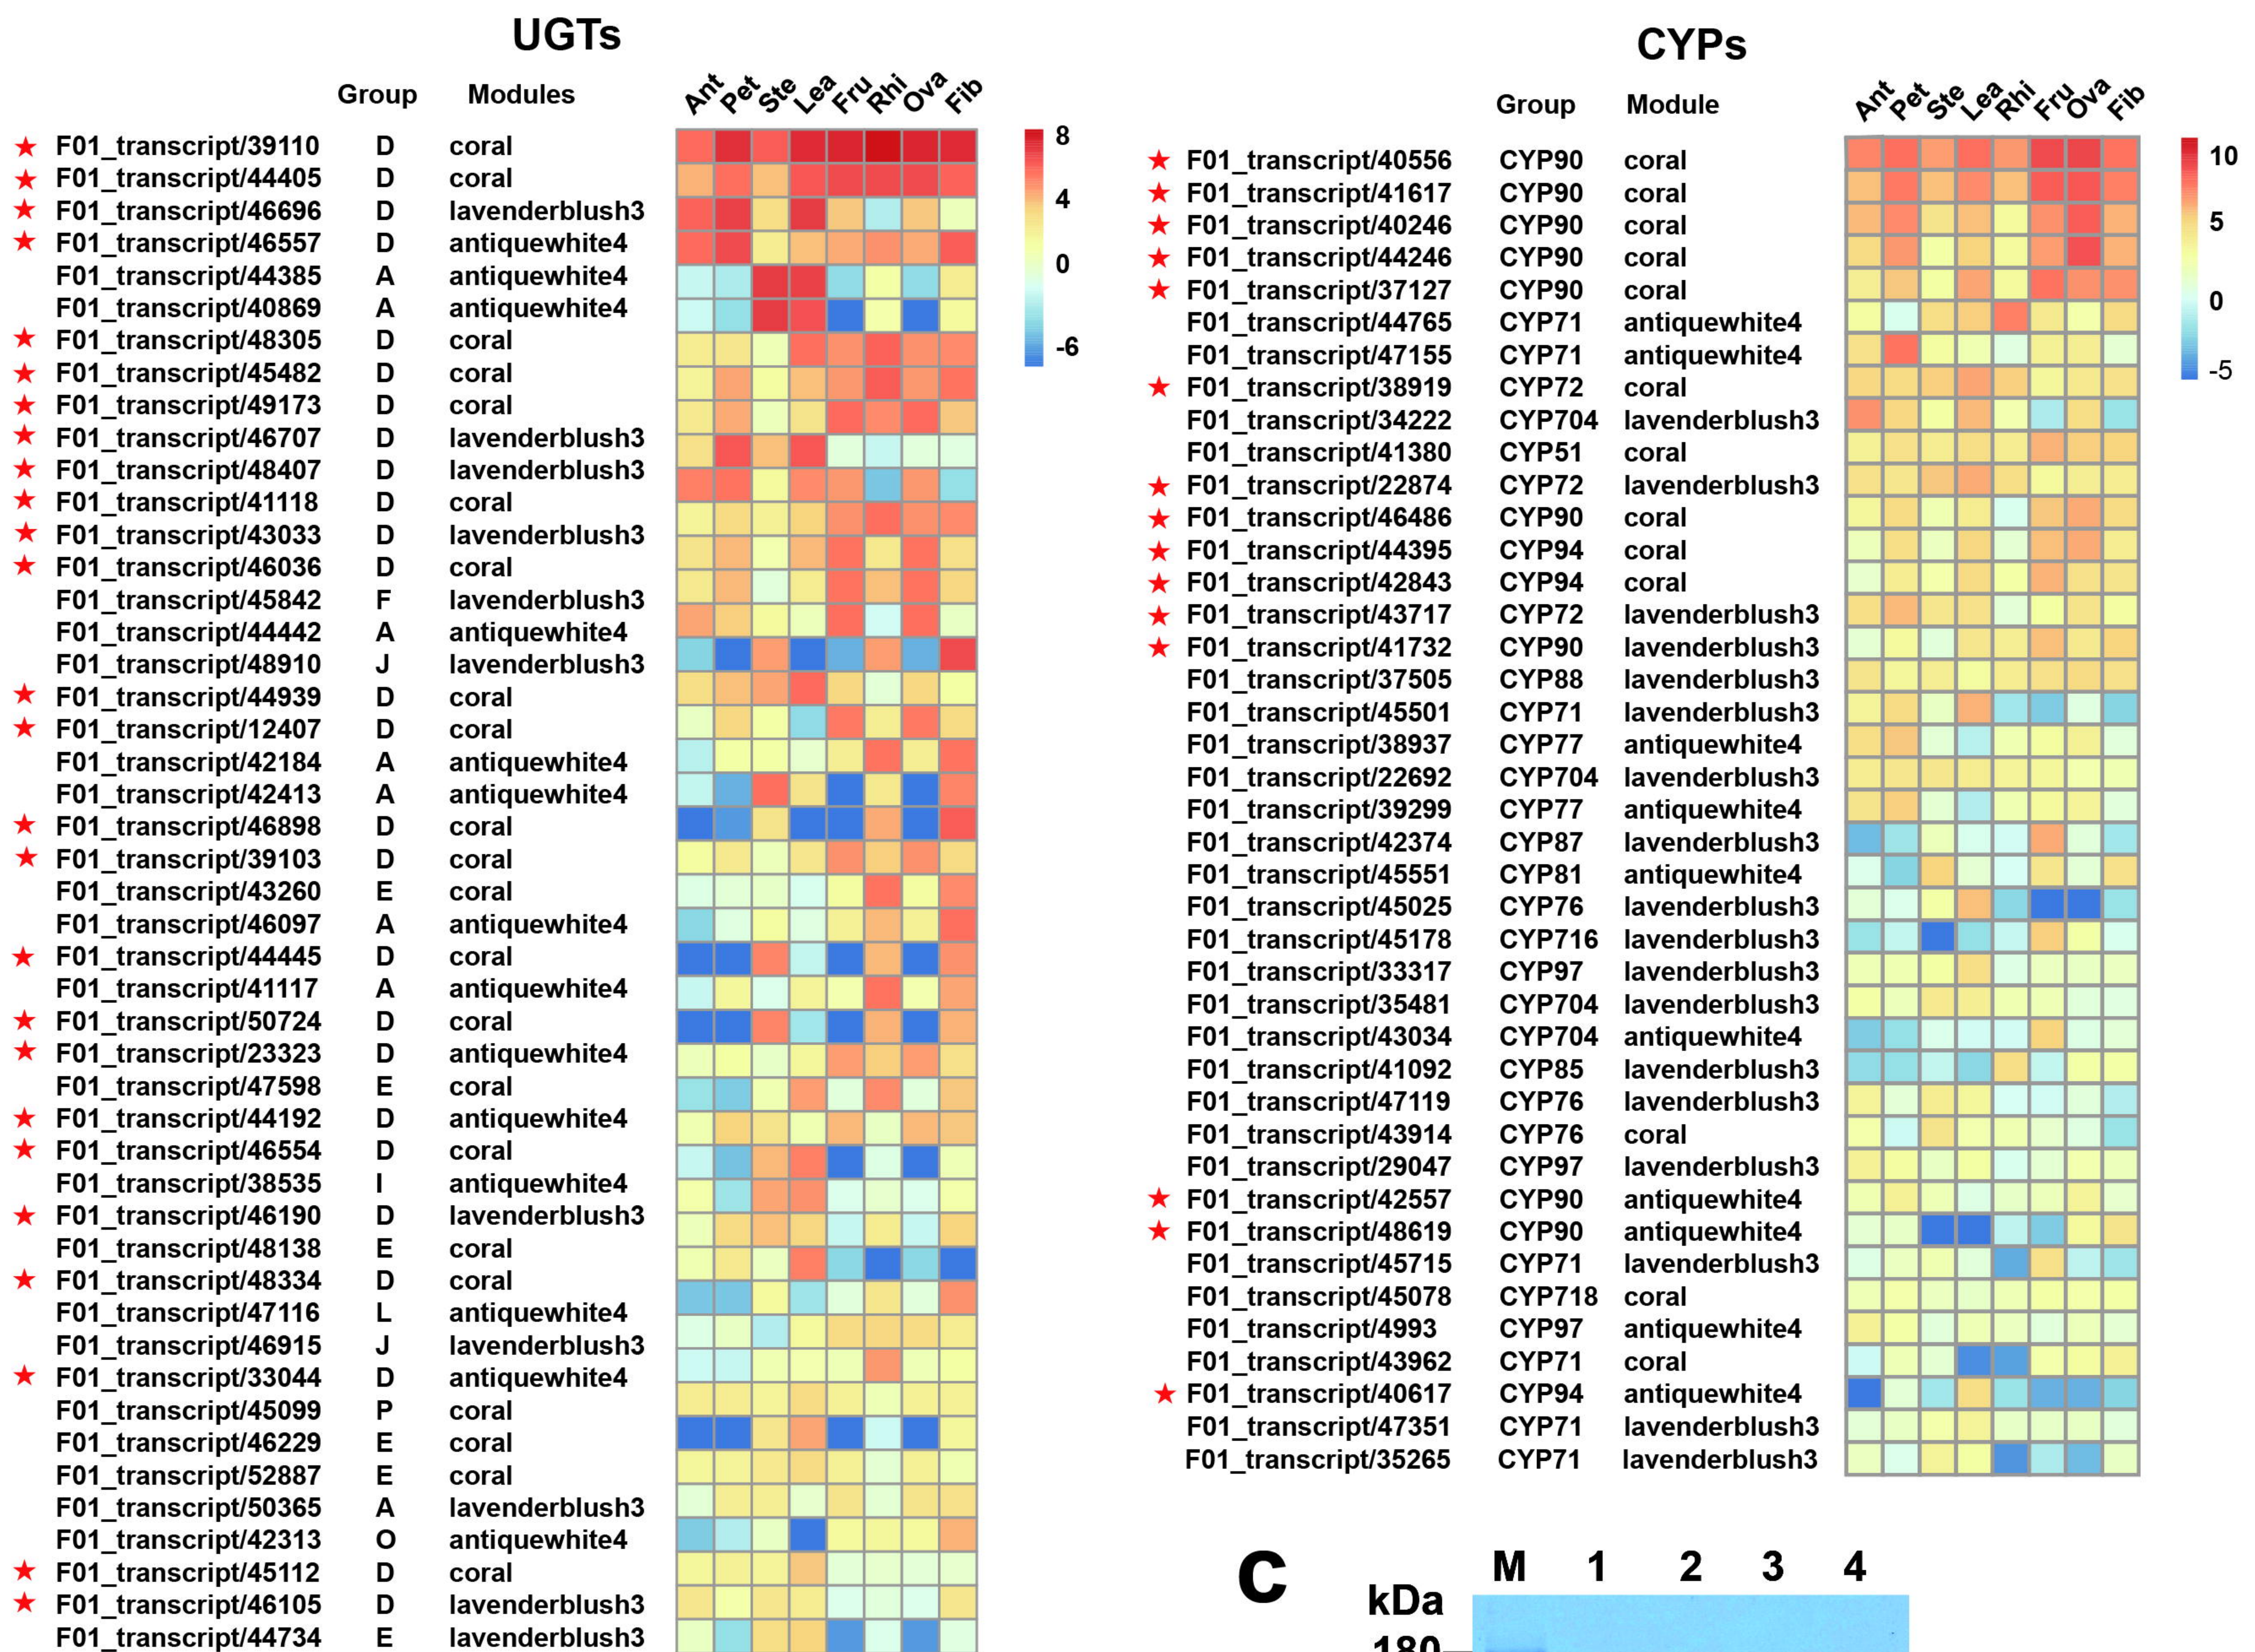**b**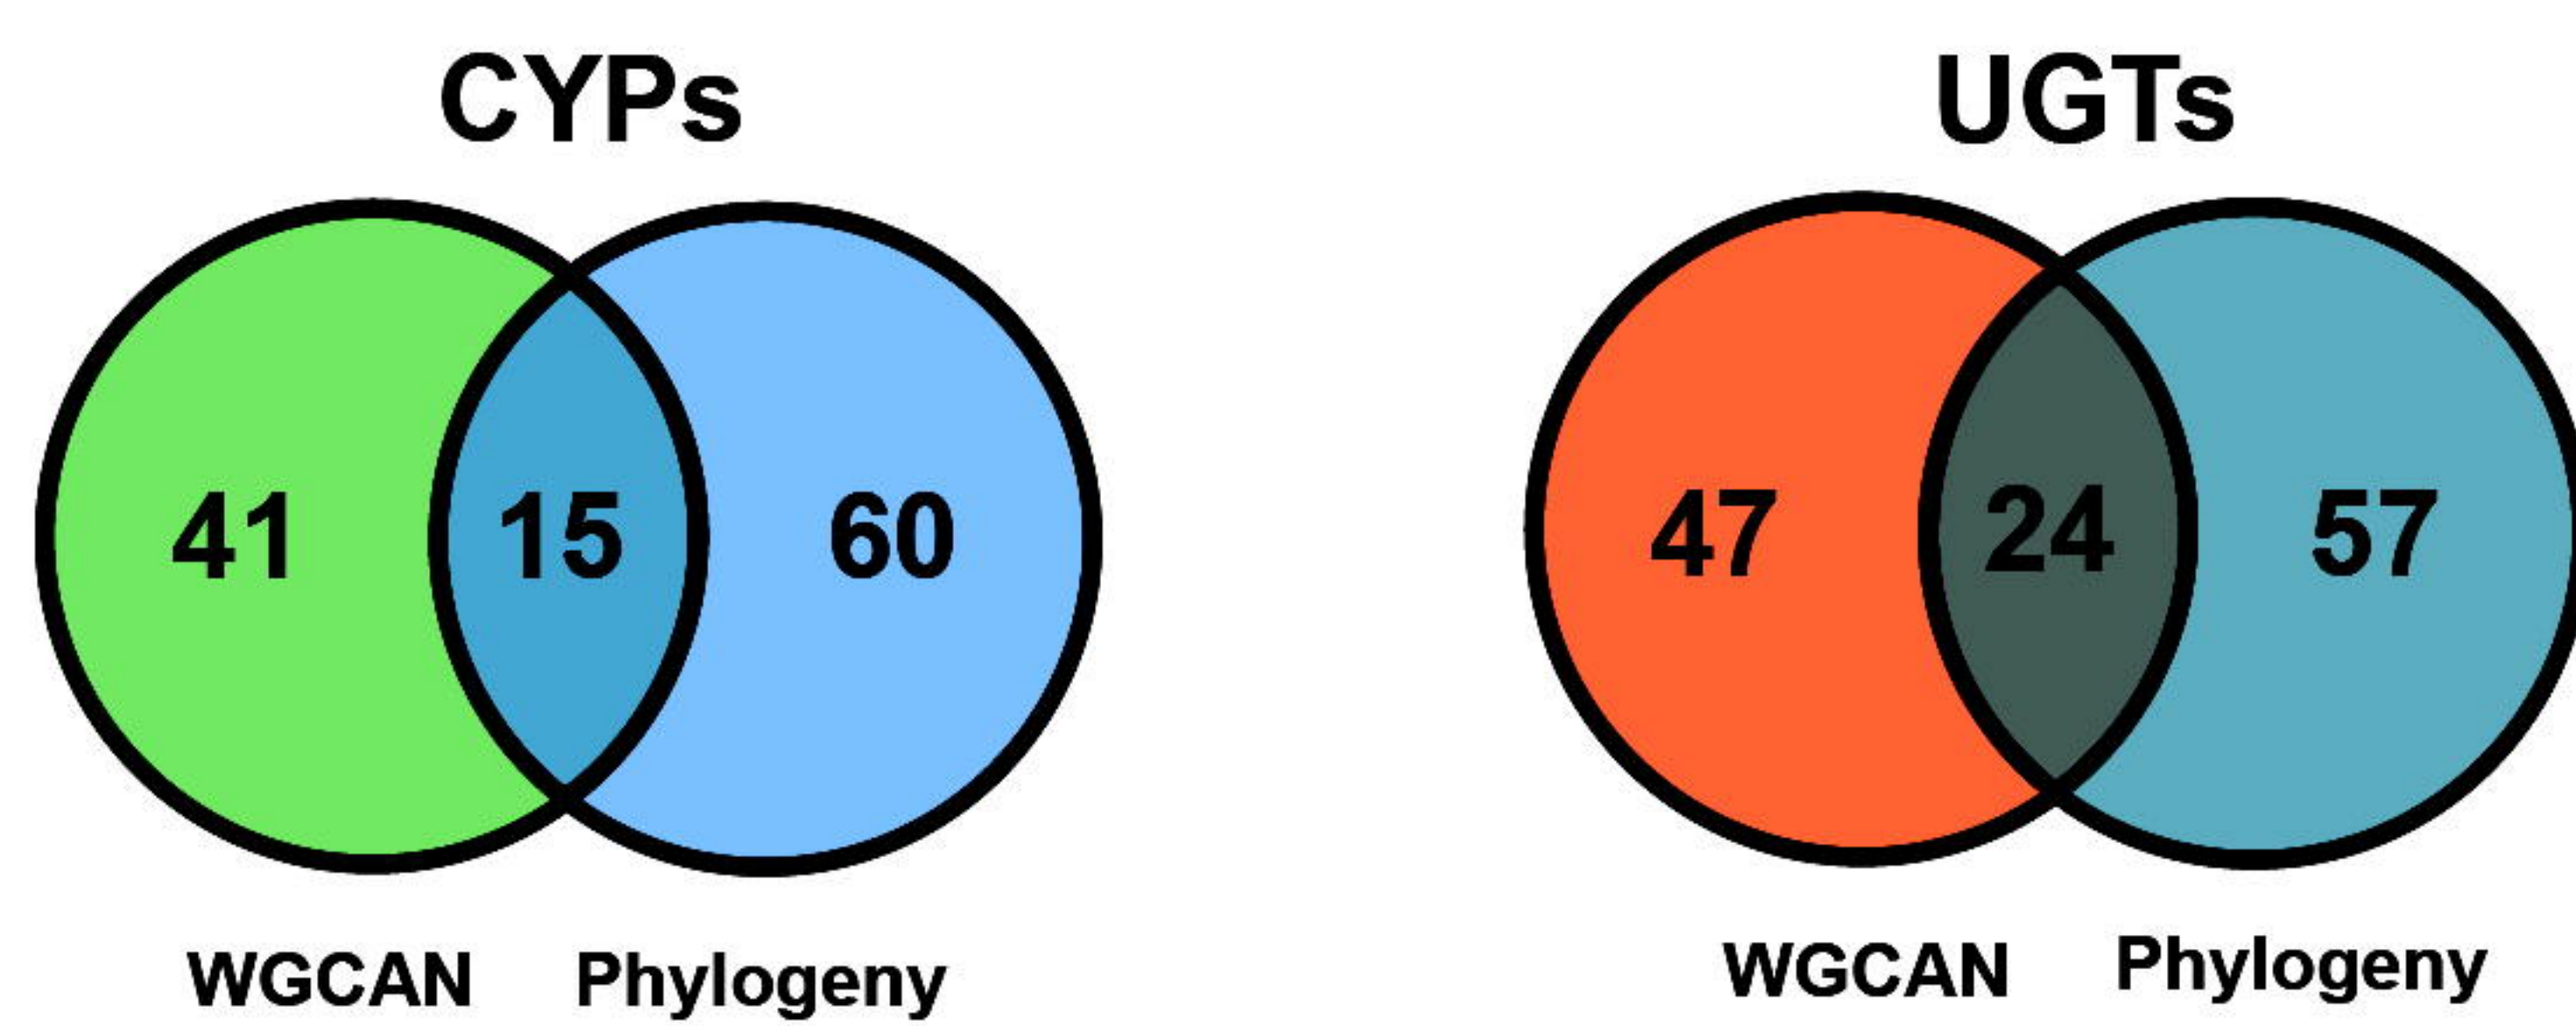**c**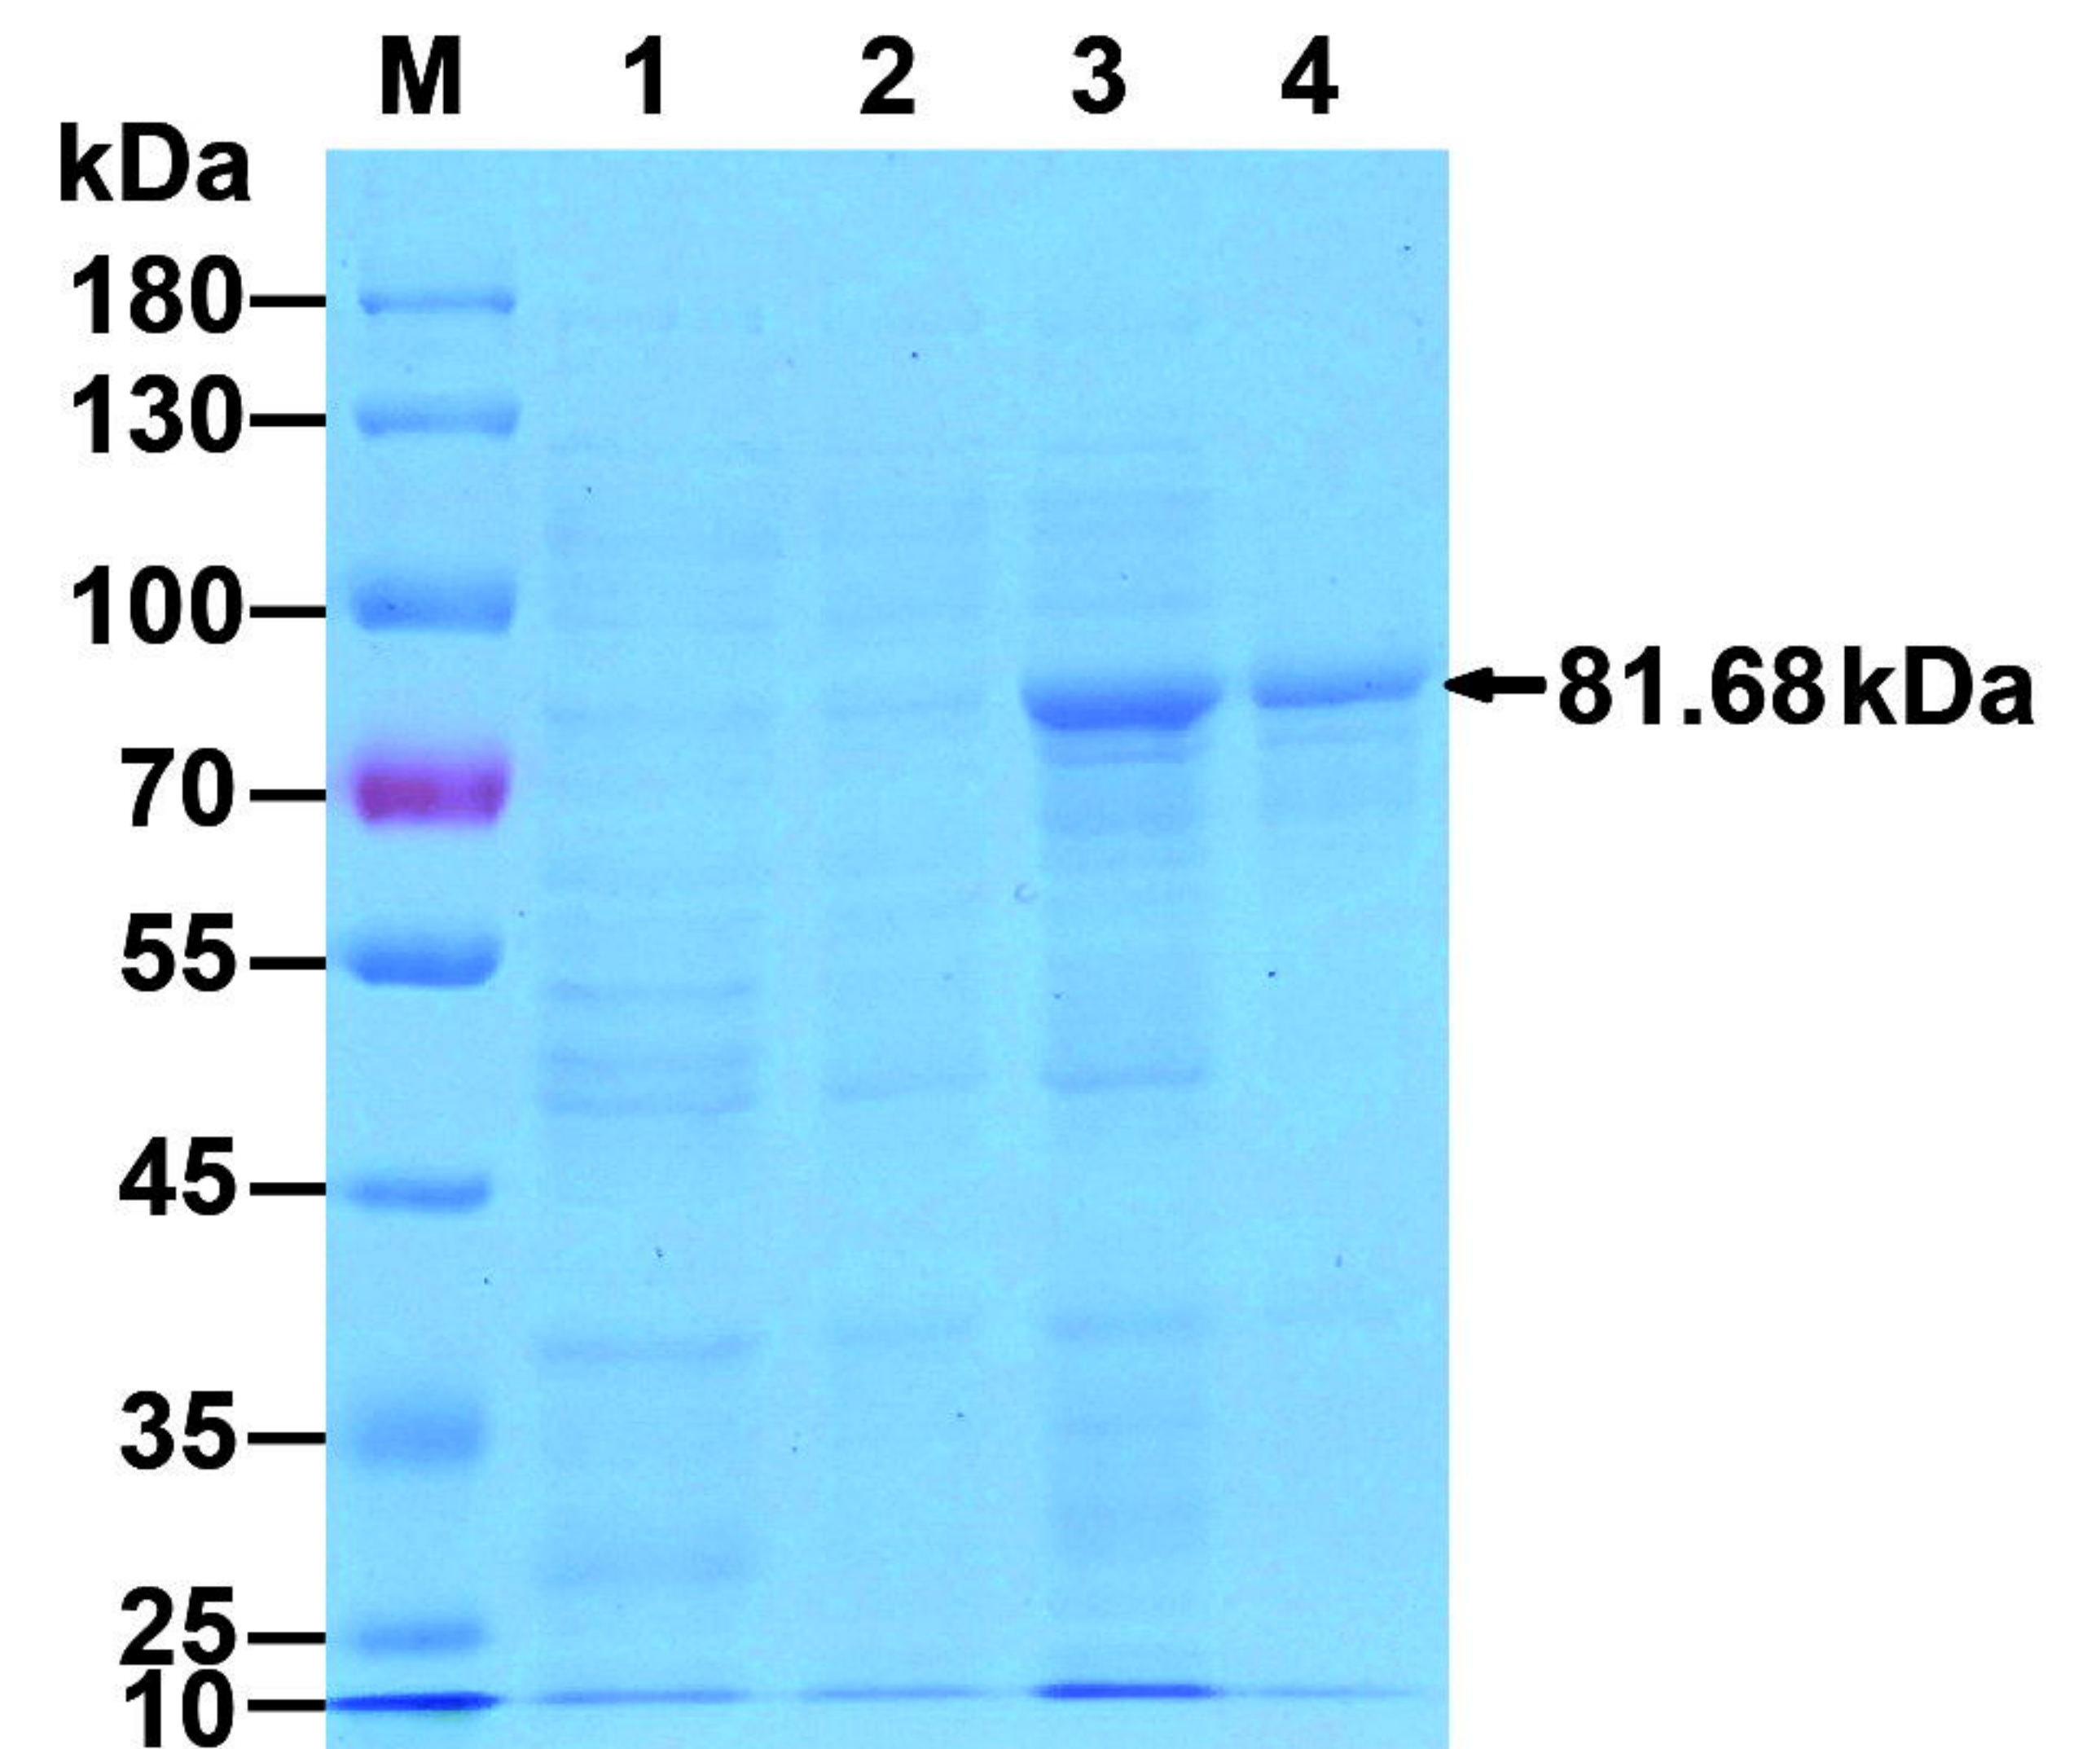**d**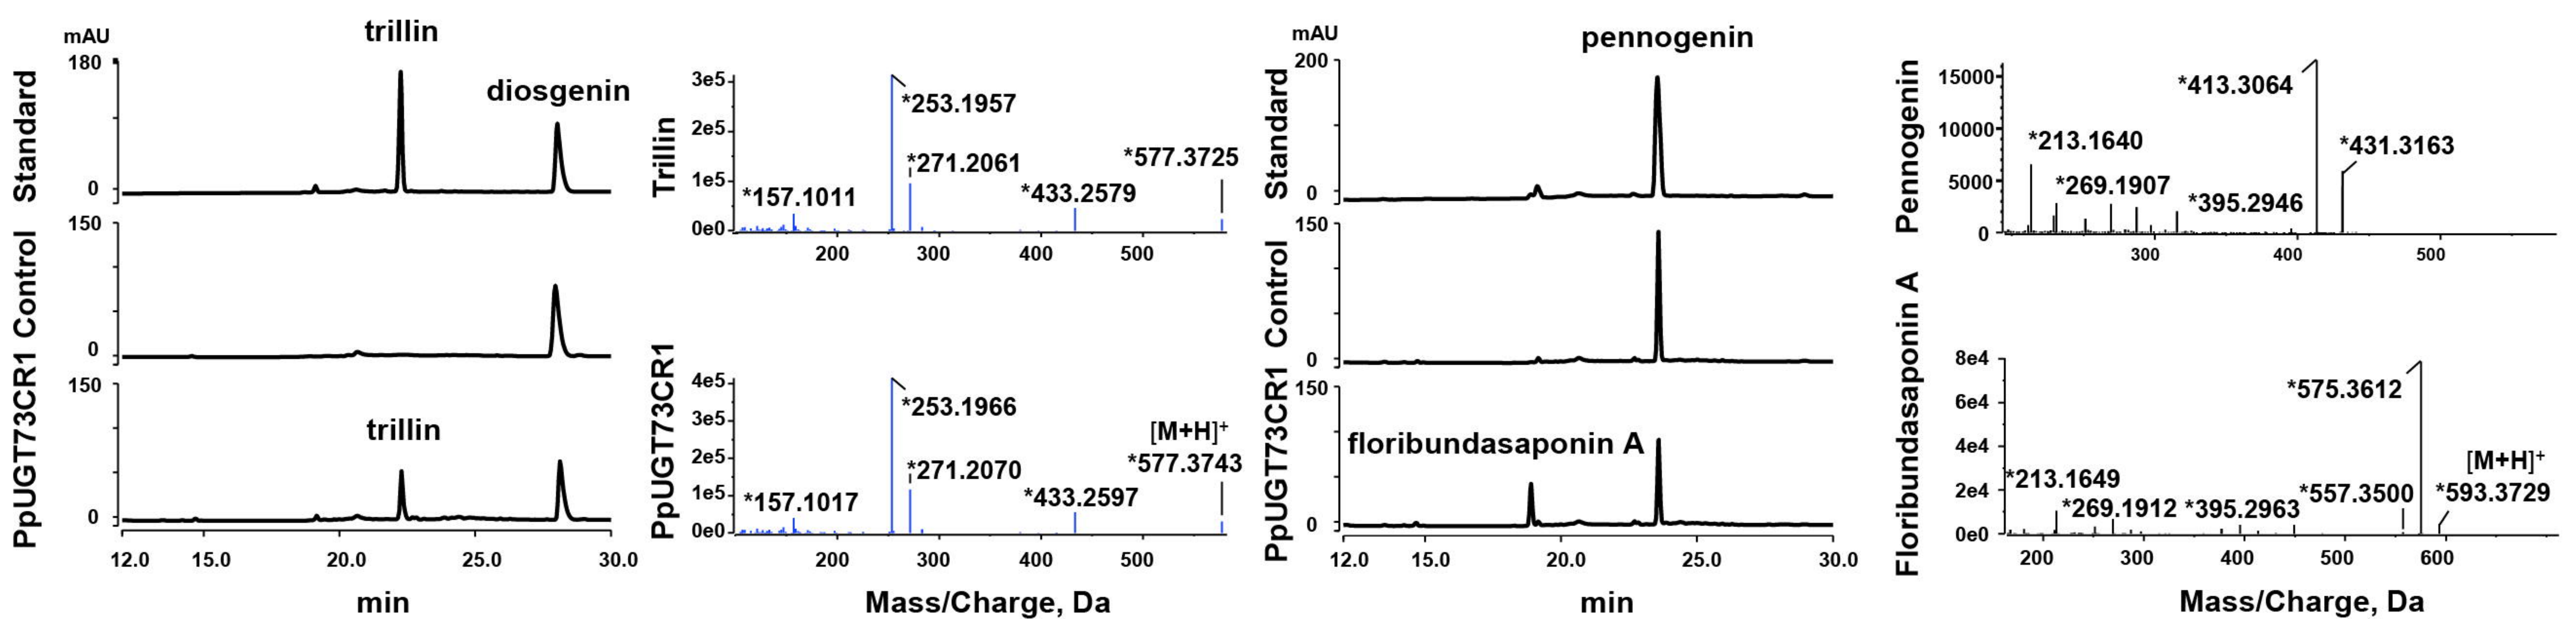

Source: https://www.biorxiv.org/content/10.1101/2021.02.01.429277v2.full.pdf
